# Supplementary material for: A channel-type mesoporous In(iii)–carboxylate coordination framework with high physicochemical stability for use as an electrode material in supercapacitors
Source: Royal Society of Chemistry journal article supplement (doi:10.1039/c4ta00963k), 2014-01-01
Supplement: c4ta00963k1.pdf [file c4ta00963k1.pdf]

**A channel-type mesoporous In(III)–carboxylate coordination framework with high physicochemical stability for electrode material of supercapacitor**

**Miao Du,<sup>\*a</sup> Min Chen,<sup>b</sup> Xiao-Gang Yang,<sup>b</sup> Jiong Wen,<sup>b</sup> Xi Wang,<sup>a</sup> Shao-Ming Fang<sup>b</sup> and  
Chun-Sen Liu<sup>\*b</sup>**

<sup>a</sup> College of Chemistry, Tianjin Key Laboratory of Structure and Performance for Functional Molecules, MOE Key Laboratory of Inorganic-Organic Hybrid Functional Material Chemistry, Tianjin Normal University, Tianjin 300387, China. E-mail: dumiao@public.tpt.tj.cn

<sup>b</sup> Henan Provincial Key Lab of Surface & Interface Science, Zhengzhou University of Light Industry, Zhengzhou 450002, Henan, China. E-mail: chunsenliu@zzuli.edu.cn

## General materials and methods

With the exception of the organic ligand 4,4',4''-(benzene-1,3,5-triyl-tris(oxy))tribenzoic acid (H<sub>3</sub>BTTB), which was prepared according to the literature method,<sup>S42</sup> all of the starting reagents and solvents were obtained commercially and used as received. Elemental analysis of C, H, and N was performed on a Vario EL III Elementar analyzer. IR spectrum was measured on a Bruker Tensor 27 OPUS FT-IR spectrometer (KBr pellet) in 4000–400 cm<sup>-1</sup> range. Powder X-ray diffraction (PXRD) patterns were recorded on a Bruker D8 Advance diffractometer (Cu-K $\alpha$ ,  $\lambda = 1.5406 \text{ \AA}$ ) at 40 kV and 100 mA, and the intensity data were recorded by continuous scans in a  $2\theta/\theta$  mode with a scan speed of 2 s/step and a step size of 0.02°. Simulation of the PXRD patterns was performed by the single-crystal data and diffraction-crystal module of the *Mercury* (Hg) program. Thermogravimetric analysis (TGA) experiments were carried out on a Perkin-Elmer Diamond SII thermal analyzer (from 25 to 800 °C) with a heating rate of 5 °C min<sup>-1</sup> under nitrogen atmosphere. The morphologies of 437-MOF samples with different treatments were characterized by using a JEOL-JSM-7001F field-emission scanning electron microscope (SEM) at an acceleration voltage of 10 kV.

The gas sorption isotherms were collected on a Micromeritics 3Flex surface area and pore size analyzer under ultrahigh vacuum in a clean system, with a diaphragm and turbo pumping system. Ultrahigh-purity-grade (> 99.999%) N<sub>2</sub>, Ar, O<sub>2</sub>, CO<sub>2</sub>, and He gases were applied in all adsorption measurements. The experimental temperatures were maintained by liquid nitrogen (77 K), liquid argon (87 K), and dry ice-acetone baths (195 K).

## X-ray data collection and structure determination

Single-crystal X-ray diffraction data for 437-MOF, 437-MOF-CH<sub>2</sub>Cl<sub>2</sub> (after solvent-exchange with CH<sub>2</sub>Cl<sub>2</sub> for three times), and 437-MOF-boiling water (after treatment in boiling water for one hour) were collected on an Oxford Xcalibur Gemini Eos diffractometer by using graphite-monochromated Cu-K $\alpha$  radiation ( $\lambda = 1.54178 \text{ \AA}$ ) at 294(2) K. Multi-scan absorption corrections were performed with the *CrysAlisPro* program.<sup>S43</sup> Empirical absorption corrections were carried out using spherical harmonics, implemented in *SCALE3 ABSPACK* scaling algorithm. The final structures were solved by direct methods, and all non-H atoms were refined

anisotropically by full-matrix least-squares method with the SHELXTL software package.<sup>S44</sup> H atoms of the hydroxyl anions were located in the difference maps and then allowed to ride on the parent atoms for refinements [with  $U_{\text{iso}}(\text{H}) = 1.2U_{\text{eq}}(\text{O})$ ]. H atoms of benzene ring were located in calculated sites and treated in the subsequent refinement as riding atoms [C–H = 0.93 Å and  $U_{\text{iso}}(\text{H}) = 1.2U_{\text{eq}}(\text{C})$ ]. Attempts to locate and model the highly disordered solvent molecules ( $\text{H}_2\text{O}$ , NMF, or  $\text{CH}_2\text{Cl}_2$  molecules) in the pores were unsuccessful. Therefore, the SQUEEZE routine, a part of the PLATON package of crystallographic software<sup>S45</sup> was used to calculate the solvent disorder area and remove the diffraction contribution from these solvents to give a set of solvent free diffraction intensity. Crystal data and structural refinement details for 437-MOF, 437-MOF- $\text{CH}_2\text{Cl}_2$ , and 437-MOF-boiling water were listed in Table S3. A comparison of the selected bond parameters was given in Table S4.

### Formula determination of 437-MOF

According to the result of single crystal X-ray determination, the framework of 437-MOF can be formulated as  $\{[\text{In}(\text{BTTB})_{2/3}(\text{OH})](\text{solvent})\}_n$  with  $Z = 6$  in the unit cell. As the highly disordered guest solvents cannot be determined by the current X-ray diffraction data, the identification of these included molecules was further taken by elemental analysis and thermogravimetric analysis (TGA). The TGA curve (see Fig. S1) of 437-MOF indicates that the exclusion of solvent molecules occurs in the temperature range of 25–180 °C, with no further weight loss up to ca. 400 °C. After that, the host framework will be destroyed with ligand decomposition upon heating. Since 437-MOF was prepared in NMF solvent, the excluded solvent molecules should be NMF and/or  $\text{H}_2\text{O}$  (coming from the starting reagents). Also, according to the result of elemental analyses (observed: C, 40.69%; H, 5.23%; N, 8.50%), the formula of 437-MOF can be determined as  $\{[\text{In}(\text{BTTB})_{2/3}(\text{OH})](\text{NMF})_5(\text{H}_2\text{O})_4\}_n$  in which the C, H, and N contents (calculated: 40.94%, 5.40%, 8.53%) are well consistent with the observed values. In addition, the observed weight loss of solvents (44.65%) in TGA curve also agrees well with the calculated value (44.73%), which further confirms this formula.

### Calculation of BET surface area of 437-MOF samples

BET equation: 
$$V = \frac{CVmx}{(1-x)[1+(c-1)x]}$$

where  $x = P/P_0$ ,  $V$  is the volume of gas adsorbed per gram of sample at standard temperature and pressure (STP),  $Vm$  is the monolayer capacity, and  $C$  is related to the heat of adsorption.

The equation can be rewritten in the form:

$$\frac{P}{V(P_0 - P)} = \frac{1}{VmC} + \frac{C-1}{VmC} \times \frac{P}{P_0}$$

The BET analysis was performed by plotting  $P/[V(P_0 - P)]$  vs.  $P/P_0$ . The slope ( $[C - 1]/VmC$ ) and  $y$  intercept ( $1/VmC$ ) of this linear region give the monolayer capacity.  $Vm$  is used to calculate the surface area from  $A = Vm\sigma_0N_{AV}$ , in which  $\sigma_0$  is the cross-sectional area of the adsorbate at solid or liquid density ( $16.2 \text{ \AA}^2$  for  $N_2$ ). Two major criteria were established to aid the choice of pressure range for the BET analysis:<sup>S94</sup> (1) The pressure range selected should have values of  $V(P_0 - P)$  increasing with  $P/P_0$ . (2) The  $y$  intercept of the linear region must be positive to yield a meaningful value of the  $C$  parameter, which should be greater than zero. A BET surface area was obtained by using the data points on the sorption branch of  $N_2$  isotherm at 77 K in the Micromeritics 3Flex 1.01.01 software package.

### **Pore size distribution of MOFs**

Pore size distribution (PSD) data for all 437-MOF samples were determined by analyzing the  $N_2$  isotherms at 77 K using the non-local density functional theory (DFT) and implementing a hybrid kernel based on a zeolite/silica model containing the cylindrical pores, as implemented in the 3Flex 1.01.01 software package.



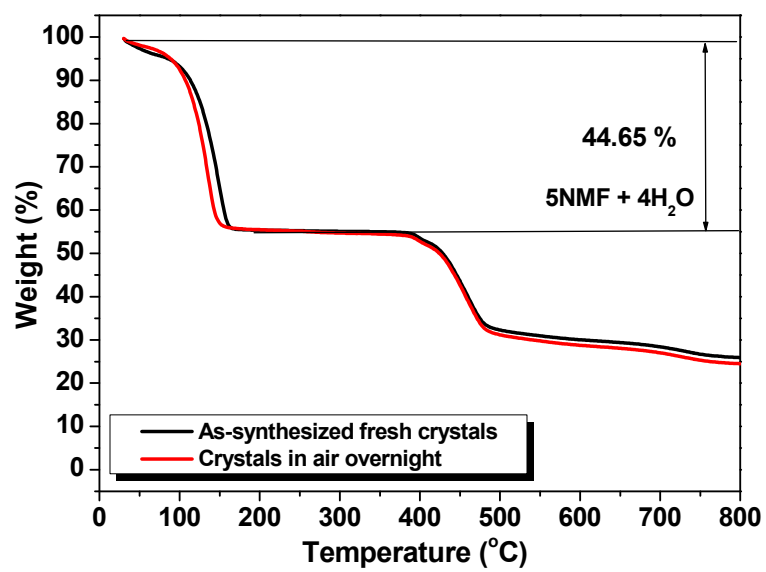

**Fig. S1** TGA curves of 437-MOF: (black curve) as-synthesized fresh crystal sample and (red curve) crystal sample placed in air overnight.

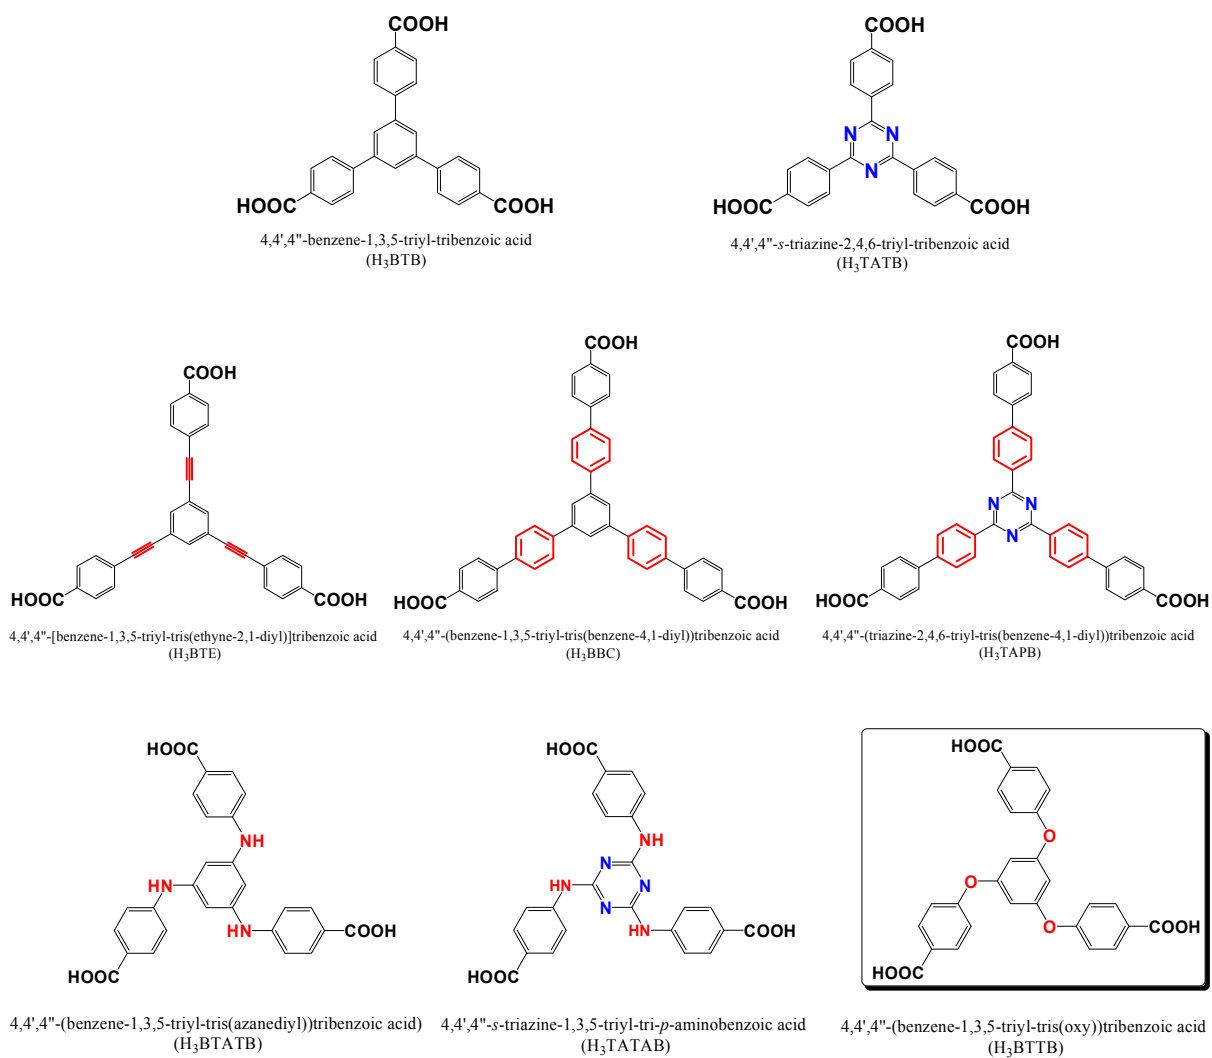

**Scheme S1** Selected trigonal carboxylic ligands derived from trimesic acid.

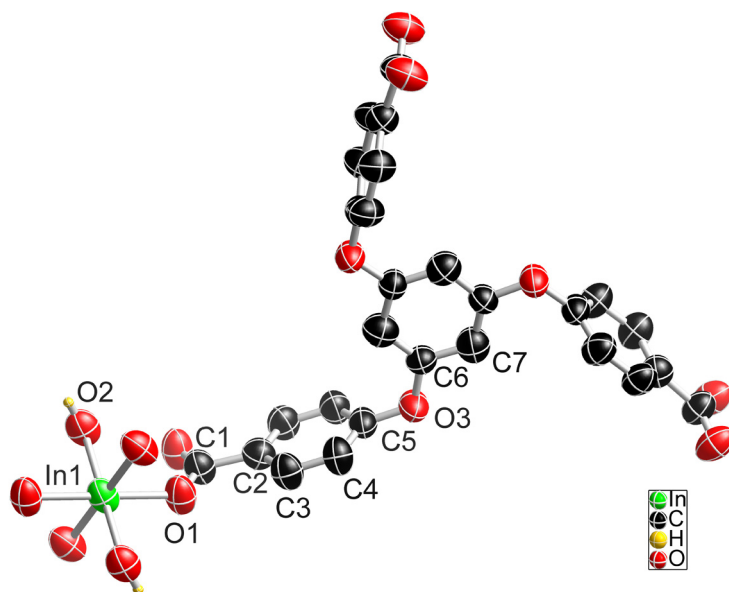

**Fig. S2** A fragment of 437-MOF with the ellipsoids drawn at the 50% probability level.

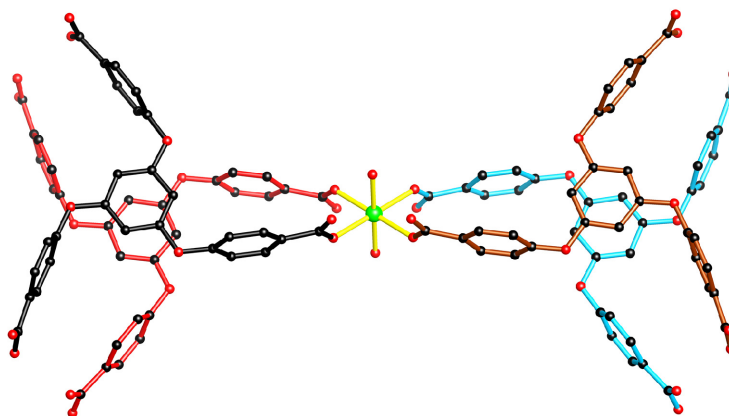

**Fig. S3** View of the local coordination geometry of In(III) in 437-MOF. The BTTB ligands are distinguished by different colors for clarity.

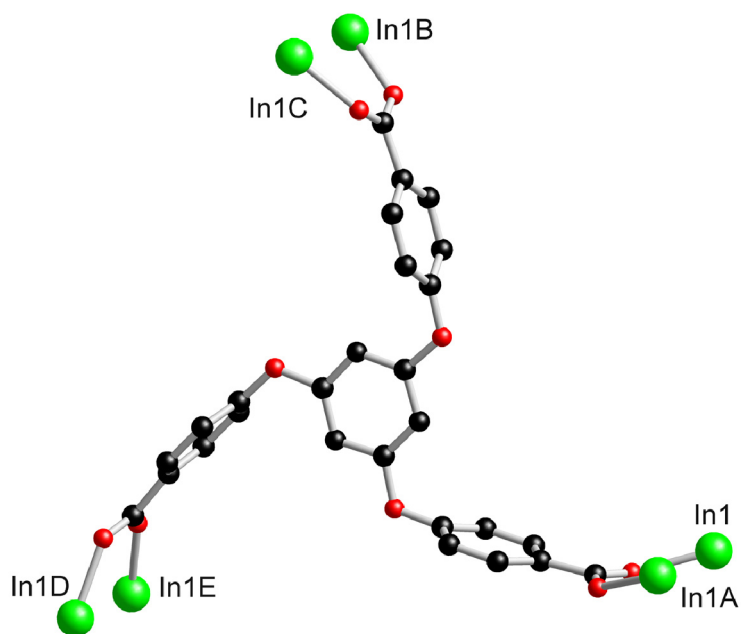

**Fig. S4** Coordination mode of the BTTB ligand ( $A = -x + 1, -y + 2, z + 1/2$ ;  $B = -y + 1, x - y + 1, z$ ;  $C = y - 1, -x + y, z + 1/2$ ;  $D = x - y + 1, x, z + 1/2$ , and  $E = -x + y, -x + 1, z$ ).

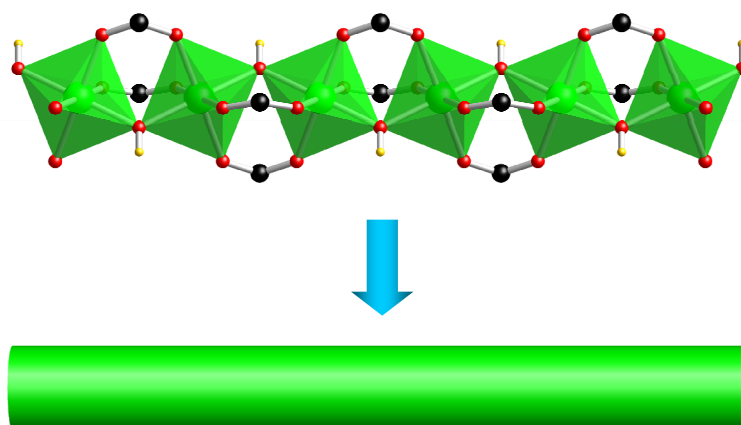

**Fig. S5** View of the 1-D rod-shaped SBU.

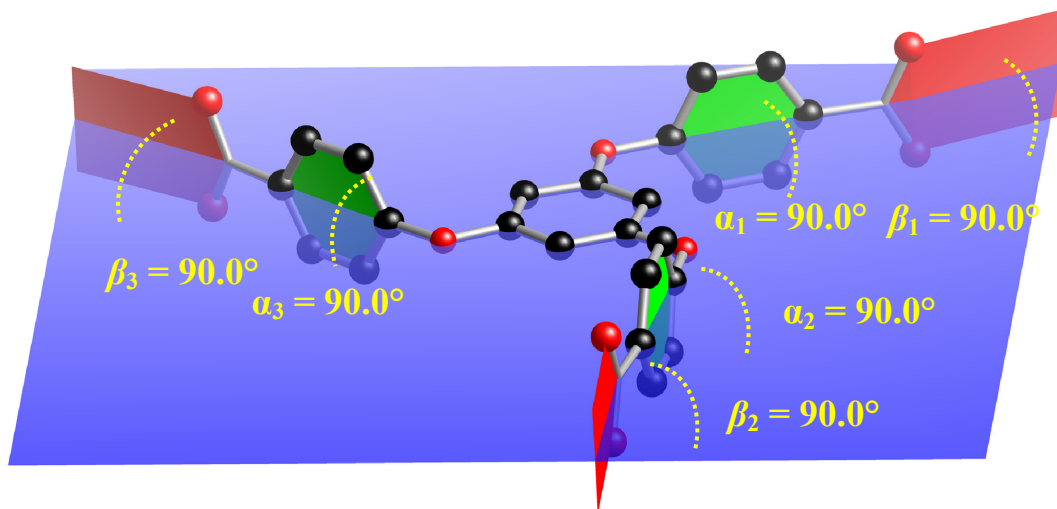

**Fig. S6** View of the perpendicular arrangement between the benzene core and the three benzene arms or the attached carboxylates ( $\alpha$  is the dihedral angle between benzene arms and benzene core;  $\beta$  is the dihedral angle between carboxylate groups and benzene core).

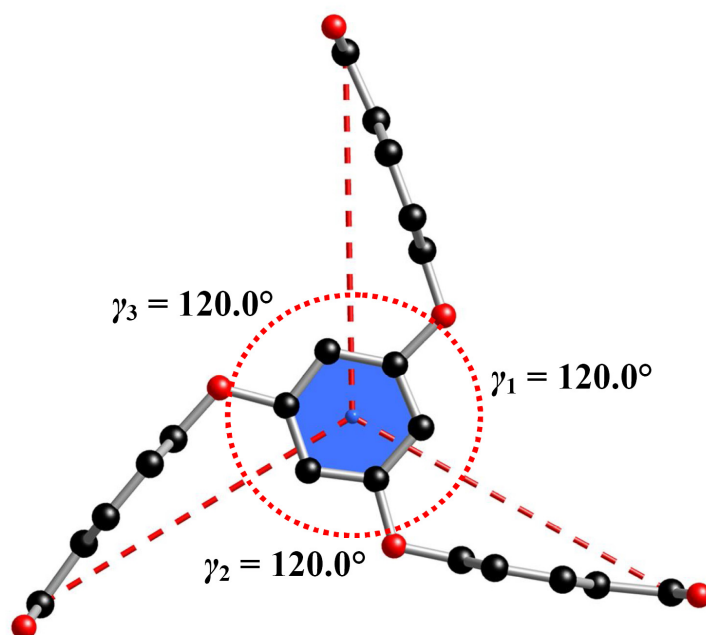

**Fig. S7** View of the equilateral triangle constituted by three carboxylate carbon atoms, the centroid of which is just the center of benzene core ( $\gamma$  is the obtuse angle between two adjacent lines linked by the center of benzene core and the carboxylate carbon atom).

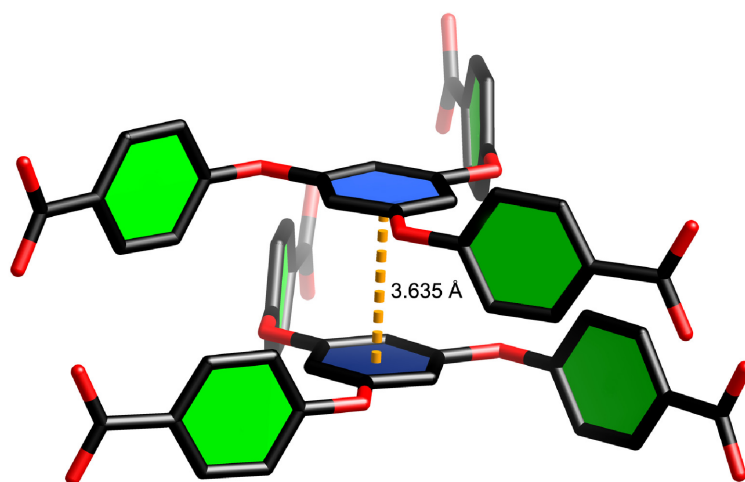

**Fig. S8** Strong  $\pi \cdots \pi$  stacking interaction between two parallel benzene cores.

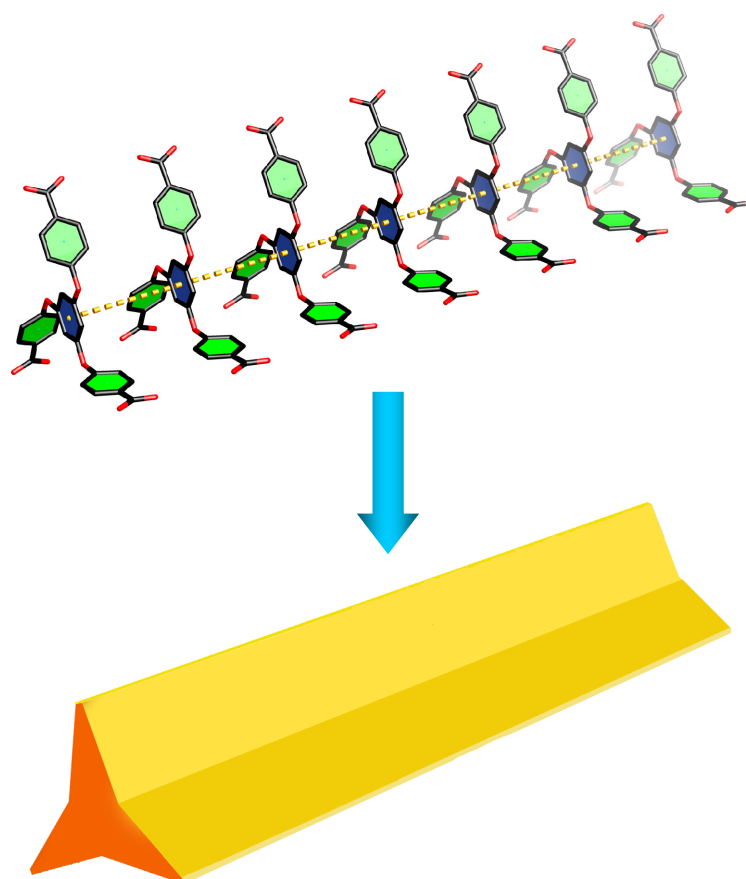

**Fig. S9** (top) Stick and (bottom) schematic views of the 1-D organic supramolecular array.

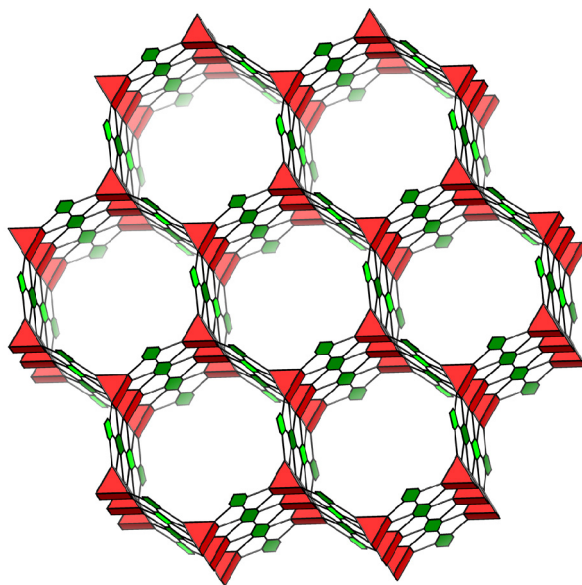

**Fig. S10** The augmented version of two-nodal six-connected 3-D network of 437-MOF.  
(BTTB and metal nodes are shown by triangular prism and hexagon, respectively).

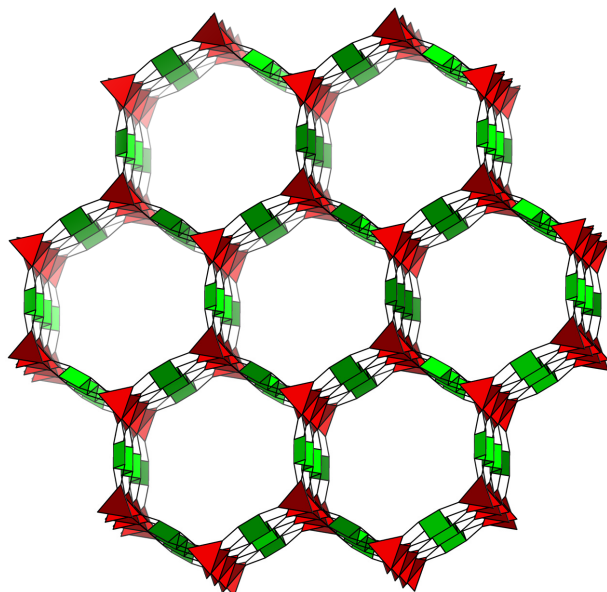

**Fig. S11** Schematic representation of the (3,4)-connected topological network of 437-MOF,  
according to the concept of infinite rod-shaped SBUs.

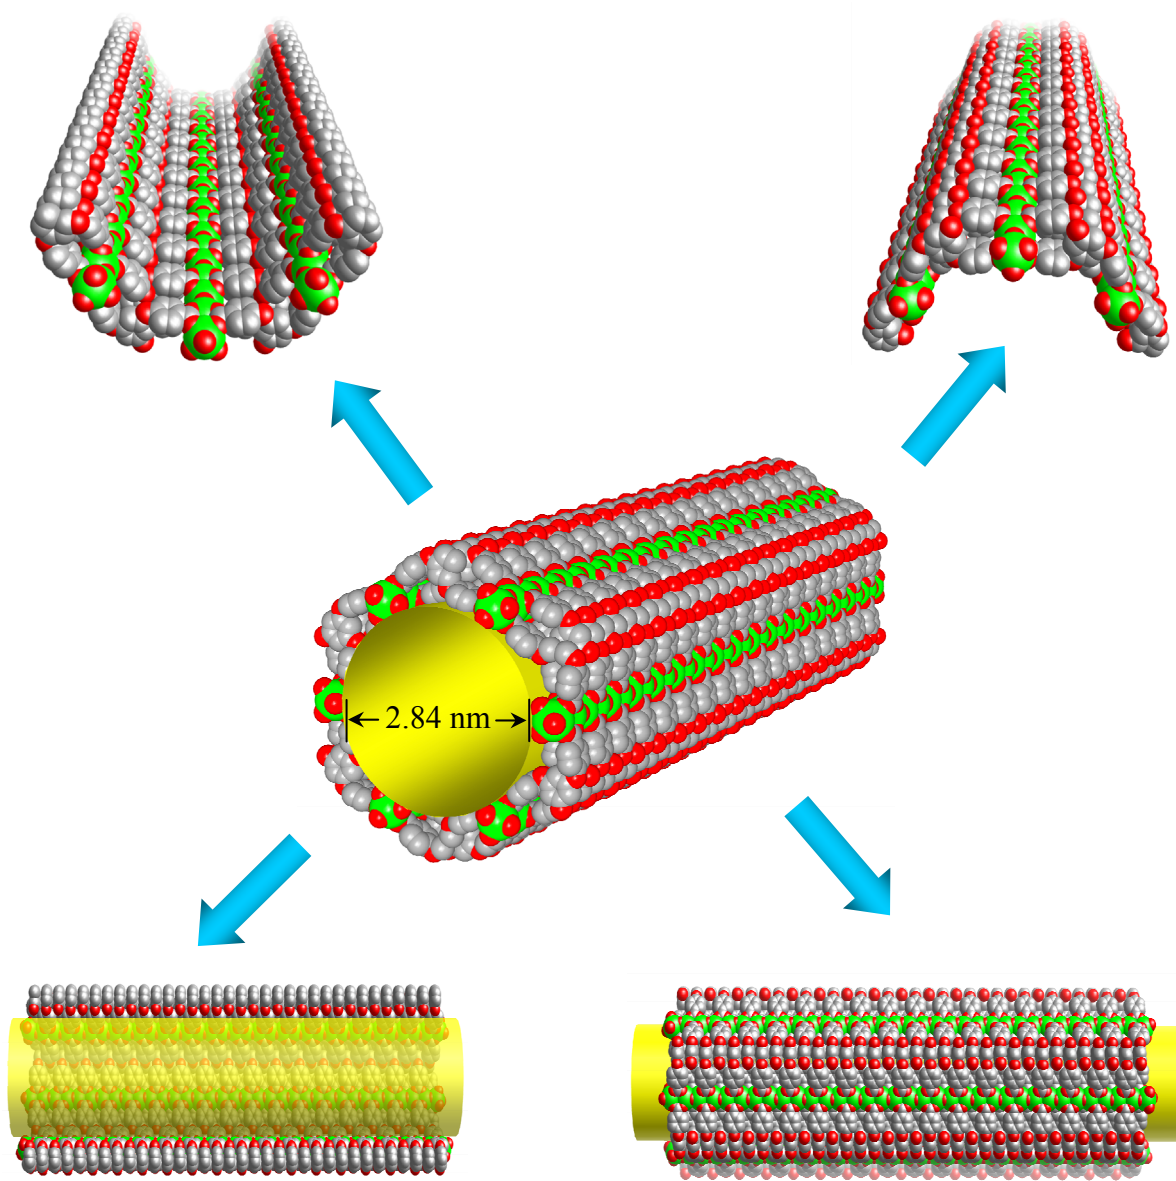

**Fig. S12** Hybrid nanotube-like structure of 437-MOF viewed from different sides (Carbon: grey, Oxygen: red, and Indium: green).



## Physicochemical stability of 437-MOF

**Thermal stability of 437-MOF.** The as-synthesized sample (ca. 10 mg) was placed inside a pre-weighed 12-mm quartz sample tube and then evacuated upon heating under different conditions for PXRD measurement (see Fig. S13). The final product, upon a long-term heating at 400 °C in vacuum, can be properly indexed to cubic  $\text{In}_2\text{O}_3$  (JCPDS No. 65-3170).

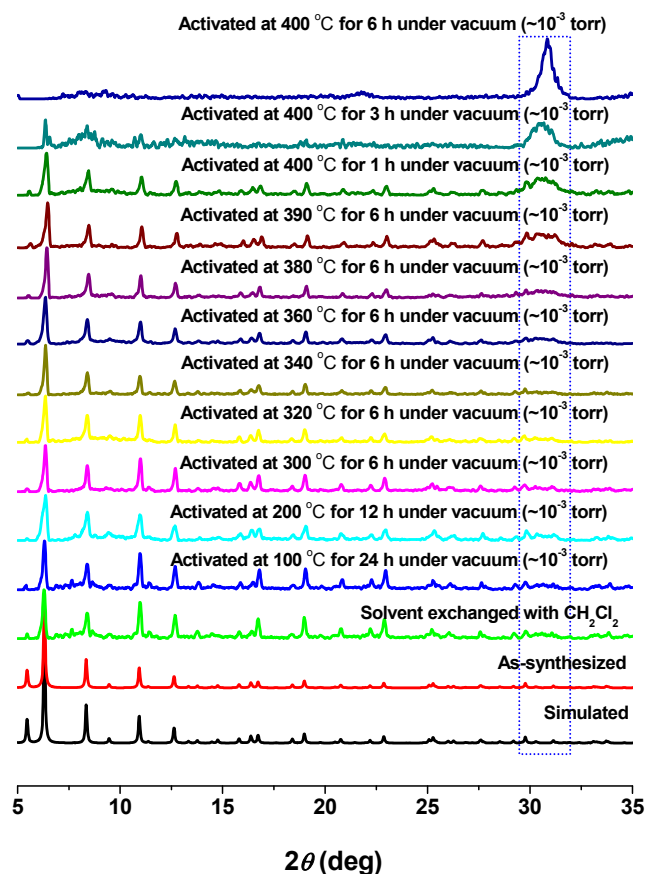

Fig. S13 PXRD patterns for heat-resistance investigation of 437-MOF.

**Chemical stability of 437-MOF.** The as-synthesized sample (ca. 30 mg) was suspended in 15 mL water and left at room temperature. After immersion, the sample was filtered and dried in air at room temperature for PXRD measurement (see Fig. S14).

The as-synthesized sample (ca. 30 mg) was dispersed into 30 mL water in a vial and then sealed into a Teflon-lined stainless steel vessel, which was heated at 100 °C in an oven. After heating, the sample was cooled down, filtered, and dried in air at room temperature for PXRD measurement (see Fig. S15).

The as-synthesized sample (ca. 10 mg) was suspended in 5 mL common organic solvent, H<sub>2</sub>O<sub>2</sub> (30%, aq.), HCl water solution, or NaOH water solution, at ambient temperature for at least 12 hours. Then, the sample was filtered and dried in air at room temperature for PXRD measurement (see Fig. S16 and Fig. S17).

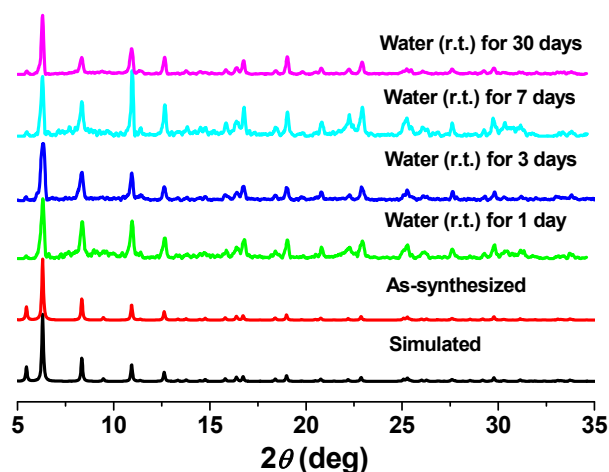

**Fig. S14** PXRD patterns of 437-MOF via treating in water at room temperature for various durations from 1 day to 30 days.

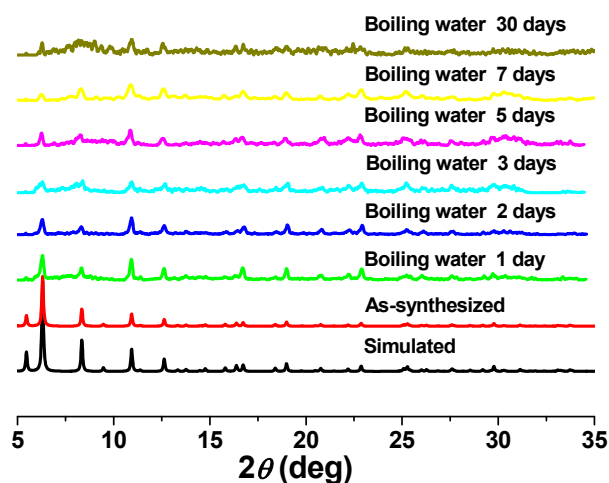

**Fig. S15** PXRD patterns of 437-MOF via treating in water at 100 °C for various durations from 1 day to 30 days.

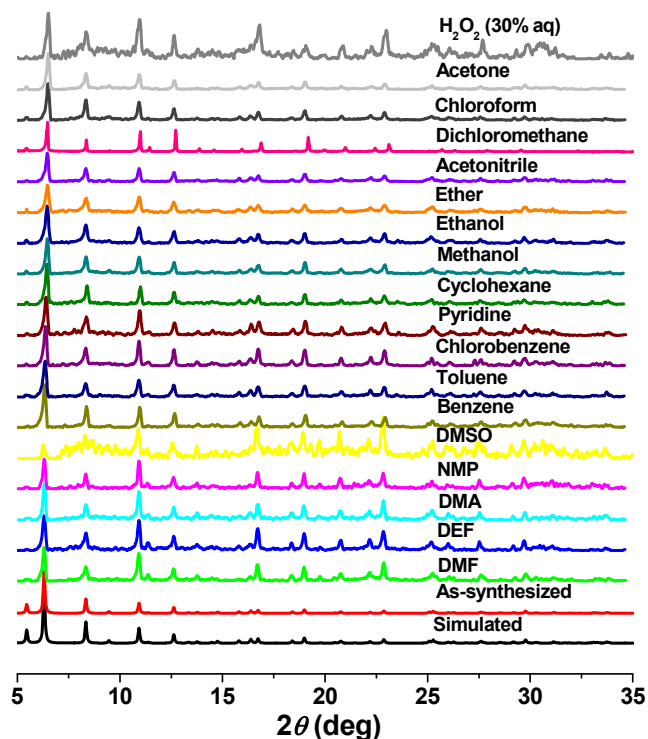

**Fig. S16** PXR D patterns of 437-MOF via treating in common organic solvents and hydrogen peroxide (aq. 30%) overnight.

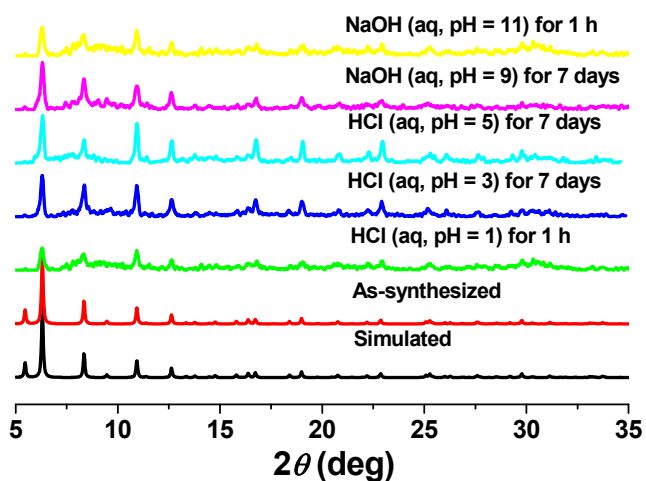

**Fig. S17** PXR D patterns of 437-MOF via treating in HCl and NaOH water solutions of pH = 1, 3, 5, 9, and 11 for various durations from 1 hour to 7 days.

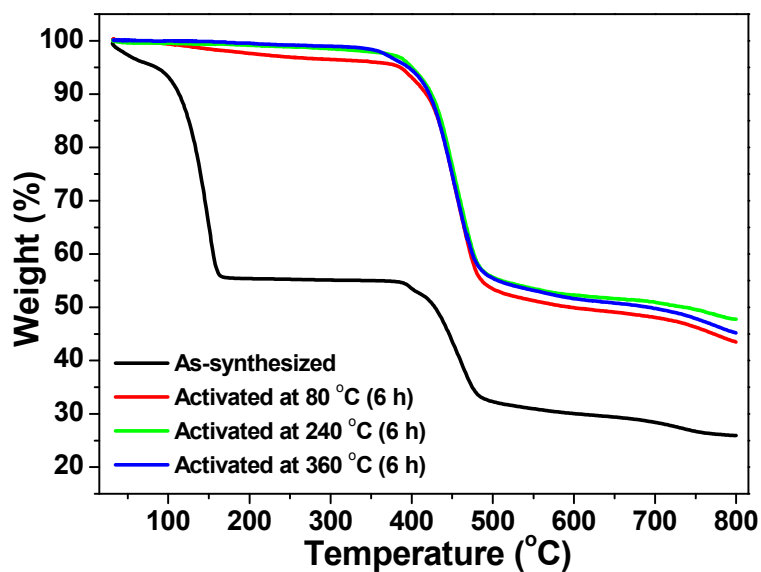

(a)

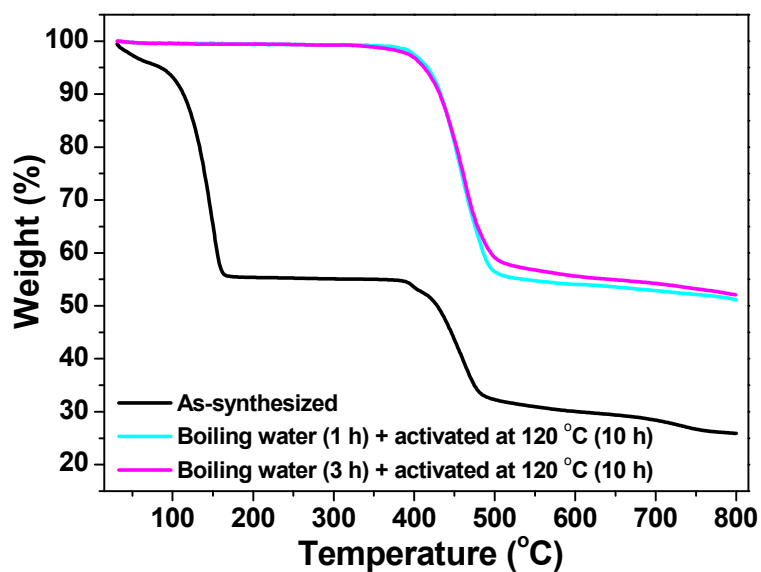

(b)

**Fig. S18** TGA curves of (a) the as-synthesized 437-MOF, 437-MOF-80, 437-MOF-240, and 437-MOF-360, and (b) the as-synthesized 437-MOF, 437-MOF-boiling water, and 437-MOF-boiling water-3h.

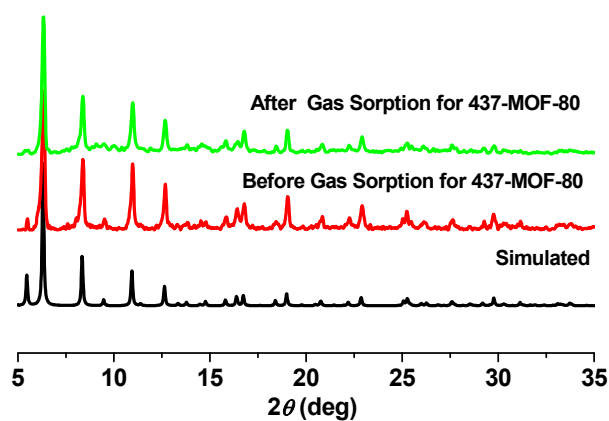

**Fig. S19** PXRD patterns of 437-MOF-80 before and after gas sorption.

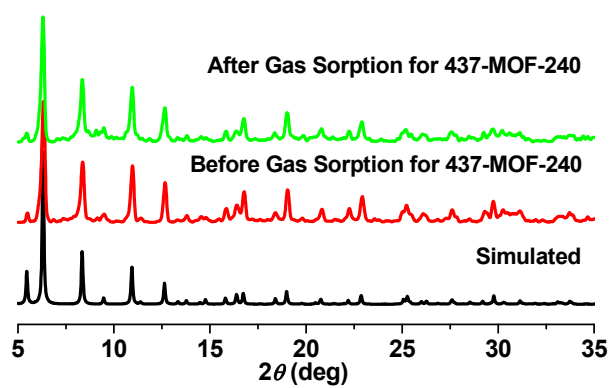

**Fig. S20** PXRD patterns of 437-MOF-240 before and after gas sorption.

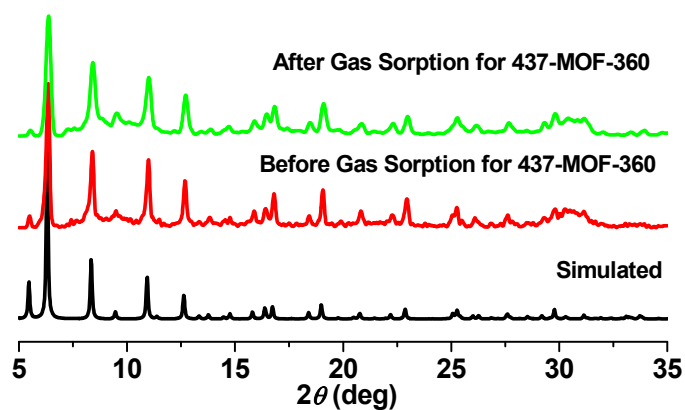

**Fig. S21** PXRD patterns of 437-MOF-360 before and after gas sorption.

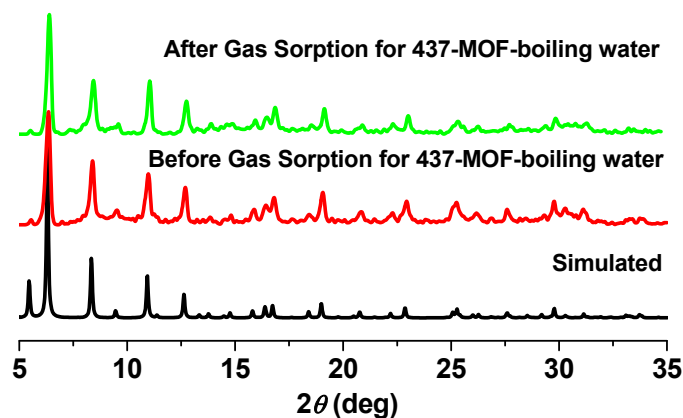

Fig. S22 PXR D patterns of 437-MOF-boiling water before and after gas sorption.

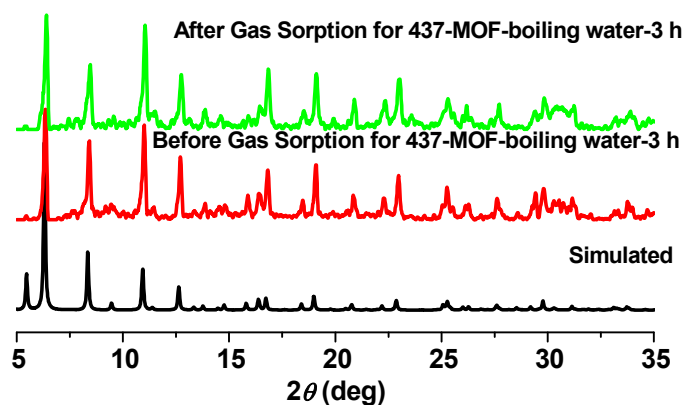

Fig. S23 PXR D patterns of 437-MOF-boiling water-3h before and after gas sorption.

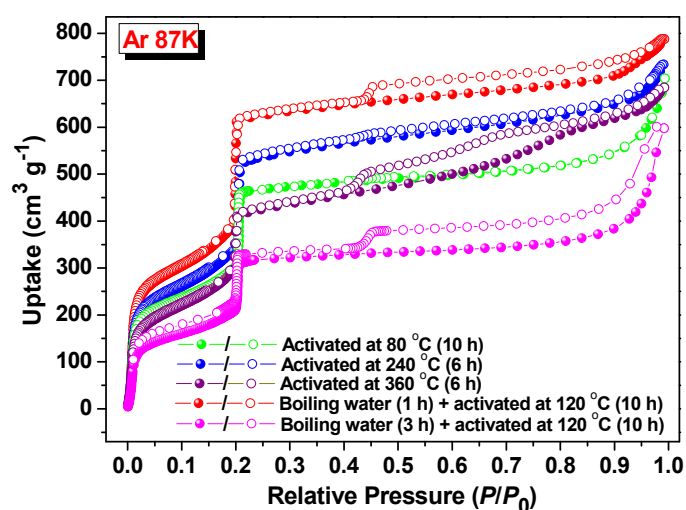

Fig. S24 Ar sorption isotherms at 87 K for 437-MOFs activated at different conditions (filled/open circles: adsorption/desorption).

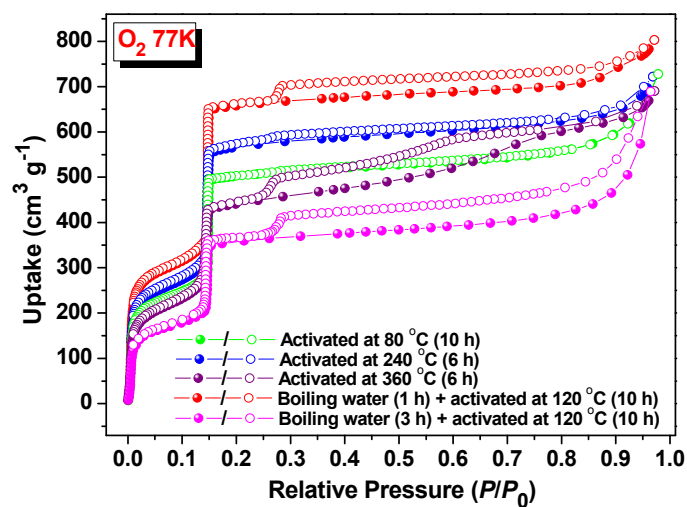

**Fig. S25** O<sub>2</sub> sorption isotherms at 77 K for 437-MOFs activated at different conditions (filled/open circles: adsorption/desorption).

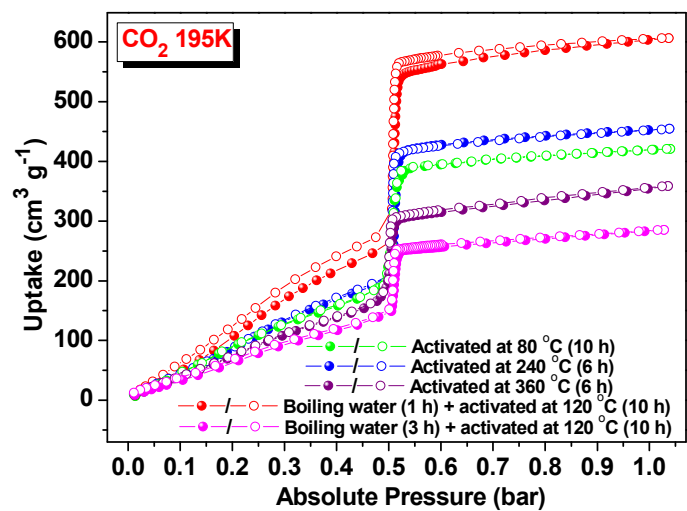

**Fig. S26** CO<sub>2</sub> sorption isotherms at 195 K for 437-MOFs activated at different conditions (filled/open circles: adsorption/desorption).

## Vapor adsorption analyses of 437-MOF

The sorption isotherms of H<sub>2</sub>O and C<sub>6</sub>H<sub>6</sub> in vapor state were measured for 437-MOF-80 with Micromeritics 3Flex surface area and pore size analyzer. The temperature was maintained by temperature-programmed water bath (298 K). The adsorption isotherm of water indicates only surface sorption on the material (Fig. S27), while C<sub>6</sub>H<sub>6</sub> vapor can be gradually adsorbed onto the sample in the lower pressure. The C<sub>6</sub>H<sub>6</sub> uptake will increase as the vapor pressure raises. The adsorption features of H<sub>2</sub>O and C<sub>6</sub>H<sub>6</sub> should be attributed to hydrophobization of the pore walls for 1-D channels in 437-MOF.

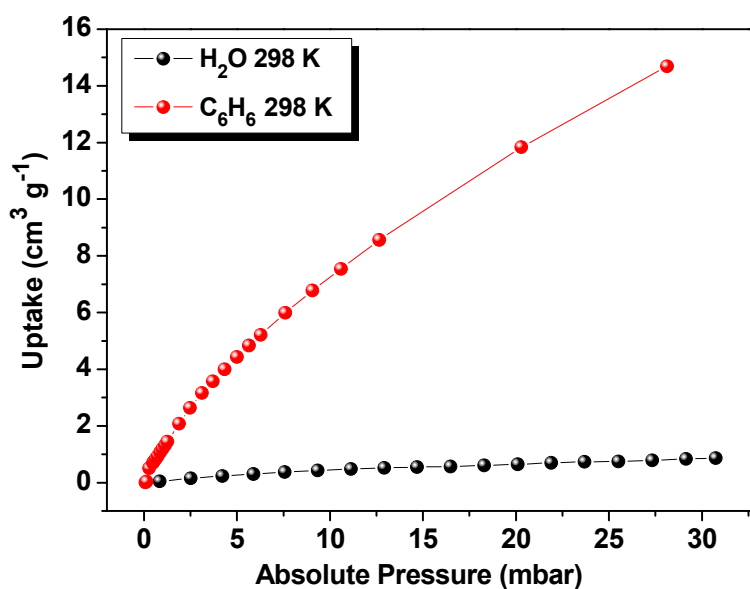

Fig. S27 H<sub>2</sub>O and C<sub>6</sub>H<sub>6</sub> adsorption isotherms of 437-MOF-80.



**Table S1** The structural features of reported mesoMOFs.

| Publish Time | mesoMOF Code        | mesoMOF Formula <sup>[a]</sup>                                                                                           | Structural Type            | Cavity-/ Channel-diameters (Å) <sup>[b]</sup>            | SBUs and/or SBBs                                                                                | Topology symbol <sup>[c]</sup> | Ref. |
|--------------|---------------------|--------------------------------------------------------------------------------------------------------------------------|----------------------------|----------------------------------------------------------|-------------------------------------------------------------------------------------------------|--------------------------------|------|
| 2004         | MIL-100             | [Cr <sub>3</sub> F(H <sub>2</sub> O) <sub>3</sub> O(BTC) <sub>2</sub> ](H <sub>2</sub> O) <sub>n</sub> (n ≈ 28)          | Cage                       | 25.0 × 25.0<br>29.0 × 29.0                               | Cr <sub>3</sub> O, Super tetrahedron                                                            | MTN                            | S1   |
| 2005         | MIL-101             | [Cr <sub>3</sub> F(H <sub>2</sub> O) <sub>2</sub> O(BDC) <sub>3</sub> ](H <sub>2</sub> O) <sub>n</sub> (n ≈ 25)          | Cage                       | 29.0 × 29.0                                              | Cr <sub>3</sub> O, Super tetrahedron                                                            | MTN                            | S2   |
| 2006         |                     |                                                                                                                          |                            | 34.0 × 34.0                                              |                                                                                                 |                                | S3   |
| 2007         | N.A. <sup>[d]</sup> | [Tb <sub>16</sub> (TATB) <sub>16</sub> (DMA) <sub>24</sub> ](DMA) <sub>91</sub> (H <sub>2</sub> O) <sub>108</sub>        | Cage                       | 39.1 × 39.1<br>47.1 × 47.1                               | Tb <sub>4</sub> cluster,<br>Truncated super tetrahedron                                         | dia                            | S4   |
| 2008         | N.A. <sup>[d]</sup> | [Cu <sub>6</sub> O(TZI) <sub>3</sub> (H <sub>2</sub> O) <sub>9</sub> (NO <sub>3</sub> )](H <sub>2</sub> O) <sub>15</sub> | Cage                       | 15.9 × 15.9<br>22.0 × 22.6<br>23.3 × 23.3                | Paddle-wheel,<br>Cu <sub>3</sub> O(N <sub>4</sub> CR) <sub>3</sub> ,<br>Truncated cuboctahedron | rlt                            | S5   |
| 2008         | ZIF-95              | [Zn(CBIM) <sub>2</sub> ]                                                                                                 | Cage                       | 25.1 × 14.3<br>30.1 × 20.0                               | N.A. <sup>[d]</sup>                                                                             | poz                            | S6   |
|              | ZIF-100             | [Zn <sub>20</sub> (CBIM) <sub>39</sub> (OH)]                                                                             |                            | 35.6 × 35.6                                              |                                                                                                 |                                |      |
| 2009         | UMCM-2              | [Zn <sub>4</sub> O(T <sup>2</sup> DC)(BTB) <sub>4/3</sub> ]                                                              | Cage                       | 14.0 × 17.0<br>23.9 × 23.9<br>26.0 × 32.0<br>13.0 × 13.0 | Zn <sub>4</sub> O                                                                               | N.A. <sup>[d]</sup>            | S7   |
| 2009         | PCN-61              | [Cu <sub>3</sub> (BTEI)(H <sub>2</sub> O) <sub>3</sub> ](DMF) <sub>5</sub> (H <sub>2</sub> O) <sub>4</sub>               | Cage                       | 15.0 × 15.0<br>23.0 × 23.0                               | Paddle-wheel, Cuboctahedron                                                                     | N.A. <sup>[d]</sup>            | S8   |
|              |                     |                                                                                                                          |                            | 13.0 × 13.0                                              |                                                                                                 |                                |      |
|              | PCN-66              | [Cu <sub>3</sub> (NTEI)(H <sub>2</sub> O) <sub>3</sub> ](DMA) <sub>21</sub> (H <sub>2</sub> O) <sub>10</sub>             | 16.0 × 16.0<br>26.0 × 26.0 | Paddle-wheel, Cuboctahedron                              | N.A. <sup>[d]</sup>                                                                             |                                |      |

Table S1 (continued)

| Publish Time | mesoMOF Code        | mesoMOF Formula <sup>[a]</sup>                                                                                                                                                                                                                                                                                | Structural Type | Cavity-/ Channel-diameters (Å) <sup>[b]</sup>                                          | SBUs and/or SBBs                                                                                              | Topology symbol <sup>[c]</sup>                                                            | Ref. |
|--------------|---------------------|---------------------------------------------------------------------------------------------------------------------------------------------------------------------------------------------------------------------------------------------------------------------------------------------------------------|-----------------|----------------------------------------------------------------------------------------|---------------------------------------------------------------------------------------------------------------|-------------------------------------------------------------------------------------------|------|
| 2009         | MIL-101-NDC         | [Cr <sub>3</sub> (OH)(H <sub>2</sub> O) <sub>2</sub> (μ <sub>3</sub> -O)(2,6-NDC) <sub>3</sub> ](guest)<br>(guest = H <sub>2</sub> O, EtOH)                                                                                                                                                                   | Cage            | 39.0 × 39.0<br>46.0 × 46.0<br>13.0 × 13.0                                              | Cr <sub>3</sub> O, Super tetrahedron                                                                          | MTN                                                                                       | S9   |
| 2009         | NOTT-112            | [Cu <sub>3</sub> (L <sup>1</sup> )(H <sub>2</sub> O) <sub>3</sub> ](DMSO) <sub>8</sub> (DMF) <sub>15</sub> (H <sub>2</sub> O) <sub>3</sub>                                                                                                                                                                    | Cage            | 13.9 × 13.9<br>20.0 × 20.0<br>25.0 × 25.0                                              | Paddle-wheel                                                                                                  | N.A. <sup>[d]</sup>                                                                       | S10  |
| 2009         | DUT-6               | [Zn <sub>4</sub> O(2,6-NDC)(BTB) <sub>4</sub> ] <sub>3</sub> (DEF) <sub>16</sub> (H <sub>2</sub> O) <sub>9/2</sub>                                                                                                                                                                                            | Cage            | 30.0 × 30.0<br>15.0 × 23.0                                                             | Zn <sub>4</sub> O<br>Zn <sub>4</sub> O                                                                        | pto<br>qom                                                                                | S11  |
| 2010         | MOF-180             | [Zn <sub>4</sub> O(BTE) <sub>2</sub> ](DMF) <sub>14.8</sub> (NMP) <sub>15.6</sub>                                                                                                                                                                                                                             | Cage            | 18.0 × 28.0<br>26.9 × 48.3                                                             | Zn <sub>4</sub> O<br>Zn <sub>4</sub> O                                                                        | qom<br>toz                                                                                | S12  |
| 2010         | MOF-200             | [Zn <sub>4</sub> O(BBC) <sub>2</sub> (H <sub>2</sub> O) <sub>3</sub> ](DEF) <sub>29.4</sub> (NMP) <sub>32.2</sub>                                                                                                                                                                                             | Cage            | 12.0 × 12.0 <sup>[e]</sup><br>14.8 × 14.8 <sup>[e]</sup><br>23.2 × 23.2 <sup>[e]</sup> | Paddle-wheel, Cuboctahedra                                                                                    | rht                                                                                       | S13  |
| 2010         | MOF-210             | [Zn <sub>4</sub> O(BTE) <sub>4</sub> 3(BPDC)](DMF) <sub>25.7</sub> (NMP) <sub>24.6</sub>                                                                                                                                                                                                                      | Cage            | 12.0 × 12.0 <sup>[e]</sup><br>18.6 × 18.6 <sup>[e]</sup><br>26.0 × 26.0 <sup>[e]</sup> | Paddle-wheel, Cuboctahedra                                                                                    | rht                                                                                       | S14  |
| 2010         | NOTT-116            | [Cu <sub>3</sub> (PTEI)(H <sub>2</sub> O) <sub>3</sub> ](DMF) <sub>16</sub> (H <sub>2</sub> O) <sub>26</sub>                                                                                                                                                                                                  | Cage            | 27.3 × 27.3<br>27.3 × 27.3                                                             | Zn <sub>4</sub> O                                                                                             | pyr                                                                                       | S14  |
| 2010         | PCN-68              | [Cu <sub>3</sub> (PTEI)(H <sub>2</sub> O) <sub>3</sub> ](DMF) <sub>33</sub> (H <sub>2</sub> O) <sub>13</sub>                                                                                                                                                                                                  | Cage            | 9.5 × 33.9<br>23.6 × 23.6                                                              | In <sub>3</sub> O(O <sub>2</sub> CR) <sub>6</sub> X <sub>3</sub><br>Cu <sub>6</sub> , Cu <sub>7</sub> cluster | (3 <sup>2</sup> .4 <sup>17</sup> .5 <sup>7</sup> .6 <sup>2</sup> )<br>N.A. <sup>[d]</sup> | S15  |
| 2010         | PCN-610             | [Cu <sub>3</sub> (TTEI)(H <sub>2</sub> O) <sub>3</sub> ](DMF) <sub>22</sub> (H <sub>2</sub> O) <sub>19</sub> <sup>[e]</sup>                                                                                                                                                                                   | Cage            | 18.0 × 18.0<br>23.0 × 23.0                                                             | Cu <sub>6</sub> , Cu <sub>7</sub> cluster                                                                     | N.A. <sup>[d]</sup>                                                                       | S16  |
| 2010         | NU-100              | [Cu <sub>3</sub> (TTEI)(H <sub>2</sub> O) <sub>3</sub> ](DMF) <sub>22</sub> (H <sub>2</sub> O) <sub>19</sub> <sup>[e]</sup>                                                                                                                                                                                   | Cage            |                                                                                        |                                                                                                               |                                                                                           |      |
| 2010         | PCN-100             | [Zn <sub>4</sub> O(TATAB) <sub>2</sub> ](DEF) <sub>17</sub> (H <sub>2</sub> O) <sub>3</sub>                                                                                                                                                                                                                   | Cage            |                                                                                        |                                                                                                               |                                                                                           |      |
| 2010         | PCN-101             | [Zn <sub>4</sub> O(BTATB) <sub>2</sub> ](DEF) <sub>16</sub> (H <sub>2</sub> O) <sub>5</sub>                                                                                                                                                                                                                   | Cage            |                                                                                        |                                                                                                               |                                                                                           |      |
| 2010         | N.A. <sup>[d]</sup> | [(In <sub>3</sub> O)(OH)(ADC) <sub>2</sub> (IN) <sub>2</sub> ](H <sub>2</sub> O) <sub>4.67</sub>                                                                                                                                                                                                              | Cage            |                                                                                        |                                                                                                               |                                                                                           |      |
| 2011         | JT-1                | [{Cu <sub>7</sub> (OH) <sub>2</sub> (L <sup>2</sup> ) <sub>3</sub> } {Cu <sub>6</sub> (OH) <sub>2</sub> (SO <sub>4</sub> ) <sub>3</sub> (S <sub>2</sub> O <sub>7</sub> ) <sub>2</sub> }] <sub>2</sub> (H <sub>2</sub> O) <sub>10</sub>                                                                        | Cage            |                                                                                        |                                                                                                               |                                                                                           |      |
| 2011         | JT-2                | [{Cu <sub>7</sub> (OH) <sub>2</sub> (L <sup>2</sup> ) <sub>3</sub> } <sub>2</sub> {Cu <sub>6</sub> (OH) <sub>2</sub> (SO <sub>4</sub> ) <sub>6</sub> (S <sub>2</sub> O <sub>7</sub> ) <sub>2</sub> }]<br>{Cu <sub>3</sub> (SO <sub>4</sub> )(H <sub>2</sub> O) <sub>6</sub> }(H <sub>2</sub> O) <sub>18</sub> | Cage            |                                                                                        |                                                                                                               |                                                                                           |      |

Table S1 (continued)

| Publish Time | mesoMOF Code        | mesoMOF Formula <sup>[a]</sup>                                                                                                                         | Structural Type | Cavity-/ Channel-diameters (Å) <sup>[b]</sup>            | SBUs and/or SBBs                                     | Topology symbol <sup>[c]</sup>                                                           | Ref. |
|--------------|---------------------|--------------------------------------------------------------------------------------------------------------------------------------------------------|-----------------|----------------------------------------------------------|------------------------------------------------------|------------------------------------------------------------------------------------------|------|
| 2011         | PCN-69              | [Cu <sub>3</sub> (BTII)(H <sub>2</sub> O) <sub>3</sub> ](DMF) <sub>20</sub> (H <sub>2</sub> O) <sub>16</sub>                                           | Cage            | 13.0 × 13.0 <sup>[f]</sup>                               | Paddle-wheel, Cuboctahedra                           | ubt                                                                                      | S19  |
| 2011         | NOTT-119            | [Cu <sub>3</sub> (BTII)(H <sub>2</sub> O) <sub>3</sub> ](DMF) <sub>35</sub> (H <sub>2</sub> O) <sub>35</sub>                                           |                 | 24.1 × 24.1 <sup>[f]</sup><br>25.0 × 25.0 <sup>[f]</sup> |                                                      |                                                                                          | S20  |
| 2011         | N.A. <sup>[d]</sup> | [Zn <sub>4</sub> O(L <sup>3</sup> ) <sub>1.5</sub> ]                                                                                                   | Cage            | 31.0 × 31.0                                              | Zn <sub>4</sub> O(CO <sub>2</sub> ) <sub>6</sub>     | cor                                                                                      | S21  |
|              |                     | [Zn <sub>4</sub> O(L <sup>4</sup> ) <sub>1.5</sub> ]                                                                                                   |                 | 37.4 × 37.4                                              |                                                      |                                                                                          |      |
|              |                     | [Zn <sub>4</sub> O(L <sup>5</sup> ) <sub>1.5</sub> ]                                                                                                   |                 | 38.4 × 38.4                                              |                                                      |                                                                                          |      |
| 2012         | PCN-53              | [Fe <sub>3</sub> O(H <sub>2</sub> O) <sub>3</sub> (BTTC) <sub>2</sub> ](DMF) <sub>10</sub>                                                             | Cage            | 12.5 × 12.5<br>14.8 × 14.8<br>22.2 × 22.2                | [Fe <sub>3</sub> O(O <sub>2</sub> CR) <sub>6</sub> ] | (4 <sup>2</sup> .6) <sub>2</sub><br>(4 <sup>4</sup> .6 <sup>4</sup> .8 <sup>6</sup> .10) | S22  |
| 2012         | PCN-105             | [Cd <sub>4</sub> Na(H <sub>2</sub> O) <sub>2</sub> (HTDBD) <sub>3</sub> (TDBD)](DMF) <sub>10</sub> (EtOH) <sub>6</sub> (H <sub>2</sub> O) <sub>3</sub> | Cage            | 20.0 × 20.0<br>21.0 × 21.0                               | Pentanuclear                                         | reo                                                                                      | S23  |
| 2012         | DUT-25              | [Zn <sub>4</sub> O(BENZTB)(BTB) <sub>2/3</sub> ](DEF) <sub>16</sub> (H <sub>2</sub> O) <sub>7/2</sub>                                                  | Cage            | 8.0 × 18.0<br>20.0 × 32.0                                | [Zn <sub>4</sub> O(CO <sub>2</sub> ) <sub>6</sub> ]  | nbo                                                                                      | S24  |
| 2012         | SUMOF-1-Zn          | [Zn <sub>6</sub> (BTB) <sub>4</sub> (4,4'-bpy) <sub>3</sub> ](solvent) <sub>x</sub>                                                                    | Cage            | 21.0 × 21.0                                              | Paddle-wheel                                         | pto                                                                                      | S25  |
|              | SUMOF-1-Co          | [Co <sub>6</sub> (BTB) <sub>4</sub> (4,4'-bpy) <sub>3</sub> ](solvent) <sub>x</sub>                                                                    |                 | 21.0 × 21.0                                              | Paddle-wheel                                         | pto                                                                                      |      |
| 2012         | N.A. <sup>[d]</sup> | [Cu <sub>3</sub> (L <sup>6</sup> )]                                                                                                                    | Cage            | 12.0 × 12.0                                              | Paddle-wheel                                         | N.A. <sup>[d]</sup>                                                                      | S26  |
|              |                     |                                                                                                                                                        |                 | 15.0 × 15.0                                              |                                                      |                                                                                          |      |
|              |                     |                                                                                                                                                        |                 | 23.0 × 23.0                                              |                                                      |                                                                                          |      |
|              |                     |                                                                                                                                                        |                 | 12.0 × 12.0                                              |                                                      |                                                                                          |      |
|              |                     | [Cu <sub>3</sub> (L <sup>7</sup> )]                                                                                                                    |                 | 15.0 × 15.0                                              |                                                      |                                                                                          |      |
|              |                     |                                                                                                                                                        |                 | 23.0 × 23.0                                              |                                                      |                                                                                          |      |
|              |                     |                                                                                                                                                        |                 | 20.0 × 20.0                                              |                                                      |                                                                                          |      |
| 2013         | MIL-143             | [Fe <sub>3</sub> O(Cl <sup>-</sup> )(H <sub>2</sub> O) <sub>2</sub> (BDC) <sub>3/2</sub> (BTB)](solvent) <sub>n</sub>                                  | Cage            | 24.0 × 24.0                                              | Super tetrahedra                                     | reo                                                                                      | S27  |
| 2013         | N.A. <sup>[d]</sup> | [(CH <sub>3</sub> ) <sub>2</sub> NH <sub>2</sub> ] <sub>2</sub> [Zn(TAIAT) <sub>2/3</sub> ](DMF) <sub>3</sub> (H <sub>2</sub> O)                       | Cage            | 21.0 × 21.0                                              | N.A. <sup>[d]</sup>                                  | N.A. <sup>[d]</sup>                                                                      | S28  |

Table S1 (continued)

| Publish Time | mesoMOF Code        | mesoMOF Formula <sup>[a]</sup>                                                                                                                                        | Structural Type | Cavity-/ Channel-diameters (Å) <sup>[b]</sup> | SBUs and/or SBBs                                    | Topology symbol <sup>[c]</sup>      | Ref. |              |                     |     |
|--------------|---------------------|-----------------------------------------------------------------------------------------------------------------------------------------------------------------------|-----------------|-----------------------------------------------|-----------------------------------------------------|-------------------------------------|------|--------------|---------------------|-----|
| 2002         | IRMOF-16            | [Zn <sub>4</sub> O(TPDC) <sub>3</sub> ](DEF) <sub>17</sub> (H <sub>2</sub> O) <sub>2</sub>                                                                            | 3D Channel      | 28.8 × 28.8                                   | Zn <sub>4</sub> O                                   | pcu                                 | S29  |              |                     |     |
|              | IRMOF-14            | [Zn <sub>4</sub> O(PDC) <sub>3</sub> ](DEF) <sub>6</sub> (H <sub>2</sub> O) <sub>5</sub>                                                                              |                 | 24.5 × 24.5                                   |                                                     |                                     |      |              |                     |     |
|              | IRMOF-12            | [Zn <sub>4</sub> O(HPDC) <sub>3</sub> ](DEF) <sub>10</sub> (H <sub>2</sub> O)                                                                                         |                 | 24.5 × 24.5                                   |                                                     |                                     |      |              |                     |     |
|              | IRMOF-10            | [Zn <sub>4</sub> O(BPDC) <sub>3</sub> ](DEF) <sub>12</sub> (H <sub>2</sub> O)                                                                                         |                 | 24.5 × 24.5                                   |                                                     |                                     |      |              |                     |     |
|              | IRMOF-8             | [Zn <sub>4</sub> O(2,6-NDC) <sub>3</sub> ](DEF) <sub>6</sub>                                                                                                          |                 | 21.4 × 21.4                                   |                                                     |                                     |      |              |                     |     |
| 2006         | MesoMOF-1           | [Cu <sub>5</sub> (TATAB) <sub>2</sub> (H <sub>2</sub> O) <sub>3</sub> ](DMF) <sub>8</sub> (H <sub>2</sub> O) <sub>9</sub>                                             | 3D Channel      | 22.5 × 26.1                                   | Paddle-wheel, Cuboctahedra                          | bor                                 | S30  |              |                     |     |
| 2009         | N.A. <sup>[d]</sup> | [Cu <sub>2</sub> (L <sup>8</sup> )(H <sub>2</sub> O) <sub>2</sub> ](DMF) <sub>14</sub> (H <sub>2</sub> O) <sub>5</sub>                                                | 3D Channel      | 3.5 × 21.2                                    | [Cu <sub>2</sub> (O <sub>2</sub> CR) <sub>4</sub> ] | pts                                 | S31  |              |                     |     |
|              | CMOF-2a             | [(R-L <sup>9a</sup> )Cu <sub>2</sub> (H <sub>2</sub> O) <sub>2</sub> ](DMF) <sub>15</sub> (H <sub>2</sub> O) <sub>11</sub>                                            | 3D Channel      | 22.0 × 15.0                                   | Paddle-wheel                                        | (4 <sup>3</sup> .6 <sup>2</sup> .8) | S32  |              |                     |     |
| 2010         | CMOF-3a             | [(R-L <sup>10a</sup> )Cu <sub>2</sub> (H <sub>2</sub> O) <sub>2</sub> ](DEF) <sub>12</sub> (H <sub>2</sub> O) <sub>16</sub>                                           |                 | 11.0 × 11.0                                   |                                                     |                                     |      |              |                     |     |
|              | CMOF-4a             | [(R-L <sup>11a</sup> )Cu <sub>2</sub> (H <sub>2</sub> O) <sub>2</sub> ](DEF) <sub>10</sub> (DMA) <sub>14</sub> (H <sub>2</sub> O) <sub>5</sub>                        |                 | 30.0 × 20.0                                   |                                                     |                                     |      |              |                     |     |
| 2010         | CMOF-2b             | [(R-L <sup>9b</sup> )Cu <sub>2</sub> (H <sub>2</sub> O) <sub>2</sub> ](DEF) <sub>11</sub> (H <sub>2</sub> O) <sub>3</sub>                                             |                 | 14.0 × 14.0                                   |                                                     |                                     |      |              |                     |     |
|              | CMOF-3b             | [(R-L <sup>10b</sup> )Cu <sub>2</sub> (H <sub>2</sub> O) <sub>2</sub> ](DMF) <sub>13</sub> (PrOH) <sub>11</sub> (H <sub>2</sub> O) <sub>4,5</sub>                     |                 | 32.0 × 24.0                                   |                                                     |                                     |      |              |                     |     |
|              | CMOF-4b             | [(R-L <sup>11b</sup> )Cu <sub>2</sub> (H <sub>2</sub> O) <sub>2</sub> ](DEF) <sub>6,5</sub> (DMF) <sub>19</sub> (PrOH) <sub>8,5</sub> (H <sub>2</sub> O) <sub>2</sub> |                 | 19.0 × 19.0                                   |                                                     |                                     |      |              |                     |     |
|              | CMOF-2              | [Zn <sub>4</sub> (μ <sub>4</sub> -O)(L <sup>12</sup> ) <sub>3</sub> ](DEF) <sub>22</sub> (H <sub>2</sub> O) <sub>4</sub>                                              |                 | 22.0 × 15.0                                   |                                                     |                                     |      |              |                     |     |
| 2010         | CMOF-3              | [Zn <sub>4</sub> (μ <sub>4</sub> -O)(L <sup>13</sup> ) <sub>3</sub> ](DMF) <sub>42</sub>                                                                              |                 | 13.0 × 13.0                                   |                                                     |                                     |      | Paddle-wheel | pcu                 | S33 |
|              | CMOF-4              | [Zn <sub>4</sub> (μ <sub>4</sub> -O)(L <sup>13</sup> ) <sub>3</sub> ](DEF) <sub>37</sub> (EtOH) <sub>23</sub> (H <sub>2</sub> O) <sub>4</sub>                         |                 | 30.0 × 20.0                                   |                                                     |                                     |      |              |                     |     |
| 2010         | Cd-MOF              | [Cd(NH <sub>2</sub> BDC)(4,4'-bpy)](DMF) <sub>5</sub> (H <sub>2</sub> O) <sub>4,5</sub>                                                                               |                 | 3D Channel                                    |                                                     |                                     |      | 18.0 × 23.0  | N.A. <sup>[d]</sup> | kag |

Table S1 (continued)

| Publish Time | mesoMOF Code        | mesoMOF Formula <sup>[a]</sup>                                                                                                                                                                      | Structural Type           | Cavity-/ Channel-diameters (Å) <sup>[b]</sup> | SBU's and/or SBBs        | Topology symbol <sup>[c]</sup>                                                                                                                   | Ref.      |
|--------------|---------------------|-----------------------------------------------------------------------------------------------------------------------------------------------------------------------------------------------------|---------------------------|-----------------------------------------------|--------------------------|--------------------------------------------------------------------------------------------------------------------------------------------------|-----------|
| 2012         | PCN-222(Fe)         | N.A. <sup>[d]</sup>                                                                                                                                                                                 | 3D Channel                | 9.2 × 11.0<br>37.0 × 37.0                     | Zr <sub>6</sub> cluster  | kag                                                                                                                                              | S35       |
| 2012         | Bio-MOF-100         | [(CH <sub>3</sub> ) <sub>2</sub> NH <sub>2</sub> ] <sub>4</sub> [Zn <sub>8</sub> (AD) <sub>4</sub> (BPDC) <sub>6</sub> O <sub>2</sub> ](DMF) <sub>49</sub> (H <sub>2</sub> O) <sub>31</sub>         | 3D Channel                | 28.0 × 28.0                                   | Zinc-adeninate octahedra | lcs                                                                                                                                              | S36       |
| 2013         | N.A. <sup>[d]</sup> | [(CH <sub>3</sub> ) <sub>2</sub> NH <sub>2</sub> ] <sub>2</sub> [ZnNa <sub>2</sub> (μ <sub>2</sub> -H <sub>2</sub> O) <sub>2</sub> (H <sub>2</sub> O) <sub>2</sub> (TATAT)](DMF) <sub>2</sub>       | 3D Channel                | 17.0 × 23.0                                   | Rod-shaped chain         | pts-x                                                                                                                                            | S28       |
| 2013         | Bio-MOF-101         | [(CH <sub>3</sub> ) <sub>2</sub> NH <sub>2</sub> ] <sub>2</sub> [Zn <sub>8</sub> (AD) <sub>4</sub> (2,6-NDC) <sub>6</sub> (OH) <sub>2</sub> ](DMF) <sub>34</sub> (H <sub>2</sub> O) <sub>13.4</sub> | 3D Channel                | 21.0 × 21.0                                   |                          |                                                                                                                                                  |           |
|              | Bio-MOF-102         | [(CH <sub>3</sub> ) <sub>2</sub> NH <sub>2</sub> ] <sub>2</sub> [Zn <sub>8</sub> (AD) <sub>4</sub> (ABDC) <sub>6</sub> (OH) <sub>2</sub> ]                                                          | 3D Channel                | 28.0 × 28.0                                   | Zinc-adeninate octahedra | lcs                                                                                                                                              | S37       |
|              | Bio-MOF-103         | [(CH <sub>3</sub> ) <sub>2</sub> NH <sub>2</sub> ] <sub>2</sub> [Zn <sub>8</sub> (AD) <sub>4</sub> (NH <sub>2</sub> -TPDC) <sub>6</sub> (OH) <sub>2</sub> ]                                         | 3D Channel                | 29.0 × 29.0                                   |                          |                                                                                                                                                  |           |
| 2008         | UMCM-1              | Zn <sub>4</sub> O(BDC)(BTB) <sub>4/3</sub>                                                                                                                                                          | Microcage +<br>1D Channel | 14.0 × 17.0<br>27.0 × 32.0                    | Zn <sub>4</sub> O        | N.A. <sup>[d]</sup>                                                                                                                              | S38       |
| 2013         | CYCU-3              | [Al(OH)(SDC)]                                                                                                                                                                                       | Multiple 1D<br>Channel    | 14.4 × 14.4<br>28.3 × 31.1                    | Rod-shaped chain         | N.A. <sup>[d]</sup>                                                                                                                              | S39       |
| 2007         | JUC-48              | [Cd <sub>3</sub> (BPDC) <sub>3</sub> (DMF)](DMF) <sub>5</sub> (H <sub>2</sub> O) <sub>18</sub>                                                                                                      | 1D Channel                | 24.5 × 27.9                                   | Rod-shaped chain         | etb                                                                                                                                              | S40       |
|              | IRMOF-74-III        |                                                                                                                                                                                                     |                           | 22.2 × 27.3                                   |                          |                                                                                                                                                  |           |
|              | IRMOF-74-IV         |                                                                                                                                                                                                     |                           | 28.0 × 32.8                                   |                          |                                                                                                                                                  |           |
|              | IRMOF-74-V          |                                                                                                                                                                                                     |                           | 35.2 × 41.1                                   |                          |                                                                                                                                                  |           |
| 2012         | IRMOF-74-VI         | N.A. <sup>[d]</sup>                                                                                                                                                                                 | 1D Channel                | 41.1 × 49.1                                   | Rod-shaped chain         | etb                                                                                                                                              | S41       |
|              | IRMOF-74-VII        |                                                                                                                                                                                                     |                           | 49.4 × 57.5                                   |                          |                                                                                                                                                  |           |
|              | IRMOF-74-IX         |                                                                                                                                                                                                     |                           | 60.5 × 71.8                                   |                          |                                                                                                                                                  |           |
|              | IRMOF-74-XI         |                                                                                                                                                                                                     |                           | 84.5 × 98.1                                   |                          |                                                                                                                                                  |           |
|              | 437-MOF             | [In(BTTB) <sub>2/3</sub> (OH)](NMF) <sub>5</sub> (H <sub>2</sub> O) <sub>4</sub>                                                                                                                    | 1D Channel                | 32.3 × 32.3                                   | Concave triangular prism | (3 <sup>3</sup> .4 <sup>6</sup> .5 <sup>6</sup> ) <sub>2</sub><br>(3 <sup>4</sup> .4 <sup>4</sup> .5 <sup>4</sup> .6 <sup>3</sup> ) <sub>3</sub> | This work |

**[a] Abbreviations:****BTC** = benzene-1,3,5-tricarboxylate;**BDC** = benzene-1,4-dicarboxylate;**TATB** = 4,4',4''-s-triazine-2,4,6-triyltribenzoate;**TZI** = 5-tetrazolylisophthalate;**CBIM** = 5-chlorobenzimidazole;**T<sup>2</sup>DC** = thieno[3,2-b]thiophene-2,5-dicarboxylate;**BTB** = 4,4',4''-benzene-1,3,5-triyl-tribenzoate;**BTEI** = 5,5',5''-benzene-1,3,5-triyltris(1-ethynyl-2-isophthalate);**NTEI** = 5,5',5''-(4,4',4''-nitriyltris(benzene-4,1-diyl)tris(ethyne-2,1-diyl))triiisophthalate;**2,6-NDC** = 2,6-naphthalenedicarboxylate;**L<sup>1</sup>** = 1,3,5-tris(3',5'-dicarboxy[1,1'-biphenyl]-4-yl)benzene;**BTE** = 4,4',4''-[benzene-1,3,5-triyl-tris(ethyne-2,1-diyl)]tribenzoate;**BBC** = 4,4',4''-(benzene-1,3,5-triyl-tris(benzene-4,1-diyl))tribenzoate;**BPDC** = 4,4'-biphenyldicarboxylate;**PTEI** = 5,5'-((5'-(4-((3,5-dicarboxyphenyl)ethynyl)phenyl)-[1,1':3',1''-terphenyl]-4,4''-diyl)-bis(ethyne-2,1-diyl))diisophthalate;**TTEI** = 5,5',5''-(((benzene-1,3,5-triyltris(ethyne-2,1-diyl))tris(benzene-4,1-diyl)tris-(ethyne-2,1-diyl))triiisophthalate);**TATAB** = 4,4',4''-s-triazine-1,3,5-triyltri-*p*-aminobenzoate;**BTATB** = 4,4',4''-(benzene-1,3,5-triyltris(azanediyl))tribenzoate;**ADC** = azobenzene-4,4'-dicarboxylate;**IN** = isonicotinate;**L<sup>2</sup>** = (*R*)-*N,N*-Bis(3-*tert*-butyl-5-(4-pyridyl)salicylidene)-3,3'-diamino-5,5',6,6'-tetramethyl-2,2'-methoxymethyl-1,1'-biphenyl;**BTTI** = 5,5',5''-(benzene-1,3,5-triyl-tris(biphenyl-4,4'-diyl))triiisophthalate;**L<sup>3</sup>** = 4,4'-(2,2-bis((4-carboxy-2-methoxyphenoxy)methyl)propane-1,3-diyl)bis(oxy)bis(3-methoxybenzoate);**L<sup>4</sup>** = 3,3'-(4,4'-(2,2-bis((4-(2-carboxyvinyl)-2-methoxyphenoxy)methyl)propane-1,3-diyl)bis(oxy)bis(3-methoxy-4,1-phenylene))diacrylate;**L<sup>5</sup>** = 6,6'-(2,2-bis((6-carboxynaphthalen-2-yloxy)methyl)propane-1,3-diyl)bis(oxy)di-2-naphthoate;**BTTT** = benzo-(1,2;3,4;5,6)-tris(thiophene-2'-carboxylate);**H<sub>2</sub>HTDBD** = 4,4'-(6-hydroxy-1,3,5-triazine-2,4-diyl)bis(azanediyl)dibenzoic acid;**BENZTB** = *N,N,N,N*-benzidinetetrabenzoate;**4,4'-bpy** = 4,4'-bipyridine;**L<sup>6</sup>** = *N,N,N*'-tris(isophthalyl)-4,4',4''-benzene-1,3,5-triyl-tribenzamide;**L<sup>7</sup>** = *N,N,N*'-tris(isophthalyl)-4,4',4''-s-triazine-2,4,6-triyl-tribenzamide;

**TATAT** = 5,5',5''-(1,3,5-triazine-2,4,6-triyl)tris(azanediyl)triisophthalate;  
**TPDC** = *p*-terphenyl-4,4''-dicarboxylate;  
**PDC** = 2,7-pyrenedicarboxylate;  
**HPDC** = 2,7-tetrahydropyrenedicarboxylate;  
**L<sup>8</sup>** = methanetetra(biphenyl-*p*-carboxylate);  
**L<sup>9a</sup>** = (*R*)-(2*E*,2*E*,2''*E*,2'''*E*)-3,3',3'',3'''-(2,2'-diethoxy-1,1'-binaphthyl-4,4',6,6'-tetrayl)tetraacrylate;  
**L<sup>10a</sup>** = (*R*)-2,2'-diethoxy-1,1'-binaphthyl-4,4',6,6'-tetrakis(4-benzoate);  
**L<sup>11a</sup>** = (*R*)-4,4',4'',4'''-(1*E*,1'*E*,1''*E*,1'''*E*)-2,2',2'',2'''-(2,2'-diethoxy-1,1'-binaphthyl-4,4',6,6'-tetrayl)tetrakis(ethene-2,1-diyl)tetrabenzoate;  
**L<sup>9b</sup>** = (*R*)-(2*E*,2'*E*,2''*E*,2'''*E*)-3,3',3'',3'''-(2,2'-dihydroxy-1,1'-binaphthyl-4,4',6,6'-tetrayl)tetraacrylate;  
**L<sup>10b</sup>** = (*R*)-2,2'-dihydroxy-1,1'-dinaphthyl-4,4',6,6'-tetrakis(4-benzoate);  
**L<sup>11b</sup>** = (*R*)-4,4',4'',4'''-(1*E*,1'*E*,1''*E*,1'''*E*)-2,2',2'',2'''-(2,2'-dihydroxy-1,1'-binaphthyl-4,4',6,6'-tetrayl)tetrakis(ethene-2,1-diyl)tetrabenzoate;  
**L<sup>12</sup>** = (*R,R*)-(-)-*N,N'*-Bis(3-carboxyl-5-*tert*-butylsalicylidene)-1,2-cyclohexanediamino manganese (III) chloride;  
**L<sup>13</sup>** = (2*E*,2'*E*)-3,3'-(5,5'-(1*E*,1'*E*)-(1*R*,2*R*)-cyclohexane-1,2-diylbis(azan-1-yl-1-ylidene)bis(methan-1-yl-1-ylidene)bis(3-*tert*-butyl-4-hydroxy-5,1-phenylene))diacrylic acid manganese (III) chloride;  
**NH<sub>2</sub>BDC** = 2-amino-1,4-benzenedicarboxylate;  
**AD** = Adenine;  
**ABDC** = 4,4'-azobenzenedicarboxylate;  
**NH<sub>2</sub>-TPDC** = 2'-amino-1,1':4,1''-terphenyl-4,4''-dicarboxylate;  
**SDC** = 4,4'-stilbenedicarboxylate;  
**BTTB** = 4,4',4''-(benzene-1,3,5-triyl-tris(oxy))tribenzoate;  
**DEF** = *N,N'*-diethylformamide;  
**DMF** = *N,N*-dimethylformamide;  
**DMA** = *N,N'*-dimethylacetamide;  
**NMP** = *N*-methyl-2-pyrrolidinone;  
**DMSO** = dimethyl sulfoxide;  
**NMF** = *N*-methylformamide;  
**[b]** Data from refs (for comparative analysis, all of the parameters are only worth reporting to one decimal place);  
**[c]** Topological symbols from ref.;  
**[d]** N.A. = Not Available;  
**[e]** Data from ref. S14;  
**[f]** Data from ref. S20.

**Table S2** The adsorption information and thermal stability of reported mesoMOFs.

| Publish Time | mesoMOF Code        | mesoMOF Formula <sup>[a]</sup>                                                                                                              | Structural Type | BET Surface Area (m <sup>2</sup> g <sup>-1</sup> ) | Langmuir Surface Area (m <sup>2</sup> g <sup>-1</sup> ) | Pore Volume (cm <sup>3</sup> g <sup>-1</sup> ) | T <sub>max</sub> of Thermal Stability <sup>[b]</sup> | Activated T <sub>max</sub> for Sorption | Ref.   |
|--------------|---------------------|---------------------------------------------------------------------------------------------------------------------------------------------|-----------------|----------------------------------------------------|---------------------------------------------------------|------------------------------------------------|------------------------------------------------------|-----------------------------------------|--------|
| 2004         | MIL-100             | [Cr <sub>3</sub> F(H <sub>2</sub> O) <sub>3</sub> O(BTC) <sub>2</sub> ](H <sub>2</sub> O) <sub>n</sub> (n ≈ 28)                             | Cage            | N.A. <sup>[c]</sup>                                | 3100                                                    | 1.16                                           | ~275 °C <sup>[b]</sup>                               | N.A. <sup>[c]</sup>                     | S1     |
| 2005         | MIL-101             | [Cr <sub>3</sub> F(H <sub>2</sub> O) <sub>2</sub> O(BDC) <sub>3</sub> ](H <sub>2</sub> O) <sub>n</sub> (n ≈ 25)                             | Cage            | 4100 <sup>[d]</sup>                                | 4500~5500 <sup>[d]</sup>                                | 2.0 <sup>[d]</sup>                             | ~275 °C <sup>[b]</sup>                               | 100 °C                                  | S2     |
| 2006         |                     |                                                                                                                                             |                 |                                                    |                                                         |                                                |                                                      | 4000/5500 <sup>[e]</sup>                | 200 °C |
| 2007         | N.A. <sup>[c]</sup> | [(Tb <sub>16</sub> (TATB) <sub>16</sub> (DMA) <sub>24</sub> )(DMA) <sub>91</sub> (H <sub>2</sub> O) <sub>108</sub> ]                        | Cage            | 1419<br>/1783                                      | 2887<br>/3855                                           | 0.98<br>/1.29                                  | ~320 °C <sup>[b]</sup>                               | 80 °C<br>/160 °C                        | S4     |
| 2008         | N.A. <sup>[c]</sup> | [Cu <sub>6</sub> O(TZI) <sub>3</sub> (H <sub>2</sub> O) <sub>9</sub> (NO <sub>3</sub> )](H <sub>2</sub> O) <sub>15</sub>                    | Cage            | 2847                                               | 3223                                                    | 1.01                                           | N.A. <sup>[c]</sup>                                  | 85 °C                                   | S5     |
| 2008         | ZIF-95              | [Zn(CBIM) <sub>2</sub> ]                                                                                                                    | Cage            | 1050                                               | 1240                                                    | 0.43                                           | ~500 °C <sup>[b]</sup>                               | 100 °C                                  | S6     |
|              | ZIF-100             | [Zn <sub>20</sub> (CBIM) <sub>39</sub> (OH)]                                                                                                |                 | 595                                                | 780                                                     | 0.37                                           |                                                      |                                         |        |
| 2009         | UMCM-2              | [Zn <sub>4</sub> O(T <sup>2</sup> DC)(BTB) <sub>4/3</sub> ]                                                                                 | Cage            | 5200                                               | 6060                                                    | N.A. <sup>[c]</sup>                            | ~400 °C <sup>[b]</sup>                               | 300 °C                                  | S7     |
| 2009         | PCN-61              | [Cu <sub>3</sub> (BTEI)(H <sub>2</sub> O) <sub>3</sub> ](DMF) <sub>5</sub> (H <sub>2</sub> O) <sub>4</sub>                                  | Cage            | 3000                                               | 3500                                                    | 1.36                                           | < 300 °C <sup>[b]</sup>                              | 150 °C                                  | S8     |
|              | PCN-66              | [Cu <sub>3</sub> (NTEI)(H <sub>2</sub> O) <sub>3</sub> ](DMA) <sub>21</sub> (H <sub>2</sub> O) <sub>10</sub>                                |                 | 4000                                               | 4600                                                    | 1.63                                           |                                                      |                                         |        |
| 2009         | MIL-101-NDC         | [Cr <sub>3</sub> (OH)(H <sub>2</sub> O) <sub>2</sub> (μ <sub>3</sub> -O)(2,6-NDC) <sub>3</sub> ](guest)<br>(guest = H <sub>2</sub> O, EtOH) | Cage            | 2100 <sup>[f]</sup><br>/1100 <sup>[g]</sup>        | N.A. <sup>[c]</sup>                                     | N.A. <sup>[c]</sup>                            | ~260 °C <sup>[b]</sup>                               | 160 °C                                  | S9     |
| 2009         | NOTT-112            | [Cu <sub>3</sub> (L <sup>1</sup> )(H <sub>2</sub> O) <sub>3</sub> ](DMSO) <sub>8</sub> (DMF) <sub>15</sub> (H <sub>2</sub> O) <sub>3</sub>  | Cage            | 3800                                               | N.A. <sup>[c]</sup>                                     | 1.62 <sup>[h]</sup><br>/1.69 <sup>[i]</sup>    | ~350 °C <sup>[b]</sup>                               | 115 °C                                  | S10    |
| 2009         | DUT-6               | [Zn <sub>4</sub> O(2,6-NDC)(BTB) <sub>4/3</sub> ](DEF) <sub>16</sub> (H <sub>2</sub> O) <sub>9/2</sub>                                      | Cage            | N.A. <sup>[c]</sup>                                | N.A. <sup>[c]</sup>                                     | 2.02                                           | 380 °C                                               | 30 °C                                   | S11    |
| 2010         | MOF-180             | [Zn <sub>4</sub> O(BTE) <sub>2</sub> ](DMF) <sub>14.8</sub> (NMP) <sub>15.6</sub>                                                           | Cage            | N.A. <sup>[c]</sup>                                | N.A. <sup>[c]</sup>                                     | N.A. <sup>[c]</sup>                            | ~350 °C <sup>[b]</sup>                               | N.A. <sup>[c]</sup>                     | S12    |
|              | MOF-200             | [Zn <sub>4</sub> O(BBC) <sub>2</sub> (H <sub>2</sub> O) <sub>3</sub> ](DEF) <sub>29.4</sub> (NMP) <sub>33.2</sub>                           |                 | 4530                                               | 10400                                                   | 3.59                                           | ~350 °C <sup>[b]</sup>                               | SCD <sup>[j]</sup> , 40 °C              |        |
|              | MOF-210             | [Zn <sub>4</sub> O(BTE) <sub>4/3</sub> (BPDC)](DMF) <sub>25.7</sub> (NMP) <sub>24.6</sub>                                                   |                 | 6240                                               | 10400                                                   | 3.60                                           | ~360 °C <sup>[b]</sup>                               | SCD <sup>[j]</sup> , 40 °C              |        |



Table S2 (continued)

| Publish Time | mesoMOF Code        | mesoMOF Formula <sup>[a]</sup>                                                                                                                                                                                                                                                                                                        | Structural Type | BET Surface Area (m <sup>2</sup> g <sup>-1</sup> ) | Langmuir Surface Area (m <sup>2</sup> g <sup>-1</sup> ) | Pore Volume (cm <sup>3</sup> g <sup>-1</sup> ) | T <sub>max</sub> of Thermal Stability <sup>[b]</sup> | Activated T <sub>max</sub> for Sorption | Ref. |
|--------------|---------------------|---------------------------------------------------------------------------------------------------------------------------------------------------------------------------------------------------------------------------------------------------------------------------------------------------------------------------------------|-----------------|----------------------------------------------------|---------------------------------------------------------|------------------------------------------------|------------------------------------------------------|-----------------------------------------|------|
| 2010         | NOTT-116            | [Cu <sub>3</sub> (PTEI)(H <sub>2</sub> O) <sub>3</sub> ](DMF) <sub>16</sub> (H <sub>2</sub> O) <sub>26</sub>                                                                                                                                                                                                                          | Cage            | 4664                                               | N.A. <sup>[c]</sup>                                     | 2.17                                           | ~300 °C <sup>[b]</sup>                               | 100 °C                                  | S13  |
| 2010         | PCN-68              | [Cu <sub>3</sub> (PTEI)(H <sub>2</sub> O) <sub>3</sub> ](DMF) <sub>33</sub> (H <sub>2</sub> O) <sub>13</sub>                                                                                                                                                                                                                          |                 | 5109                                               | 6033                                                    | 2.13                                           | ~275 °C <sup>[b]</sup>                               | 100 °C                                  | S14  |
| 2010         | PCN-610             | [Cu <sub>3</sub> (TTEI)(H <sub>2</sub> O) <sub>3</sub> ](DMF) <sub>22</sub> (H <sub>2</sub> O) <sub>19</sub> <sup>[d]</sup>                                                                                                                                                                                                           | Cage            | N.A. <sup>[e]</sup>                                | N.A. <sup>[c]</sup>                                     | N.A. <sup>[c]</sup>                            | ~320 °C <sup>[b]</sup>                               | N.A. <sup>[e]</sup>                     | S14  |
| 2010         | NU-100              | N.A. <sup>[e]</sup>                                                                                                                                                                                                                                                                                                                   |                 | 6143                                               | N.A. <sup>[c]</sup>                                     | 2.82                                           | ~325 °C <sup>[b]</sup>                               | SCD <sup>[j]</sup> , 110 °C             | S15  |
| 2010         | PCN-100             | [Zn <sub>4</sub> O(TATAB) <sub>2</sub> ](DEF) <sub>17</sub> (H <sub>2</sub> O) <sub>3</sub>                                                                                                                                                                                                                                           | Cage            | N.A. <sup>[e]</sup>                                | 860                                                     | 0.58                                           | ~150 °C <sup>[b]</sup>                               | R.T. <sup>[k]</sup>                     | S16  |
| 2010         | PCN-101             | [Zn <sub>4</sub> O(BTATB) <sub>2</sub> ](DEF) <sub>16</sub> (H <sub>2</sub> O) <sub>5</sub>                                                                                                                                                                                                                                           |                 | N.A. <sup>[e]</sup>                                | 1140                                                    | 0.75                                           | ~180 °C <sup>[b]</sup>                               | R.T. <sup>[k]</sup>                     |      |
| 2010         | N.A. <sup>[e]</sup> | [(In <sub>3</sub> O)(OH)(ADC) <sub>2</sub> (IN) <sub>2</sub> ](H <sub>2</sub> O) <sub>4.67</sub>                                                                                                                                                                                                                                      | Cage            | 1857                                               | 1496                                                    | N.A. <sup>[c]</sup>                            | ~350 °C <sup>[b]</sup>                               | 100 °C                                  | S17  |
| 2011         | JT-1                | [{Cu <sub>7</sub> (OH) <sub>2</sub> (L <sup>2</sup> ) <sub>3</sub> } <sub>2</sub> {Cu <sub>6</sub> (OH) <sub>2</sub> (SO <sub>4</sub> ) <sub>3</sub> (S <sub>3</sub> O <sub>10</sub> ) <sub>2</sub> } <sub>2</sub> ](H <sub>2</sub> O) <sub>10</sub>                                                                                  | Cage            | 375                                                | N.A. <sup>[c]</sup>                                     | N.A. <sup>[c]</sup>                            | ~200 °C <sup>[b]</sup>                               | N.A. <sup>[e]</sup>                     | S18  |
|              | JT-2                | [{Cu <sub>7</sub> (OH) <sub>2</sub> (L <sup>2</sup> ) <sub>3</sub> } <sub>2</sub> {Cu <sub>6</sub> (OH) <sub>2</sub> (SO <sub>4</sub> ) <sub>6</sub> (S <sub>2</sub> O <sub>7</sub> ) <sub>2</sub> } <sub>2</sub> {Cu <sub>3</sub> (SO <sub>4</sub> )(H <sub>2</sub> O) <sub>6</sub> } <sub>2</sub> ](H <sub>2</sub> O) <sub>18</sub> |                 | 421                                                | N.A. <sup>[c]</sup>                                     | N.A. <sup>[c]</sup>                            | ~200 °C <sup>[b]</sup>                               | N.A. <sup>[e]</sup>                     |      |
| 2011         | PCN-69              | [Cu <sub>3</sub> (BTII)(H <sub>2</sub> O) <sub>3</sub> ](DMF) <sub>20</sub> (H <sub>2</sub> O) <sub>16</sub>                                                                                                                                                                                                                          | Cage            | 3989                                               | 6278                                                    | 2.17                                           | ~280 °C <sup>[b]</sup>                               | 100 °C                                  | S19  |
| 2011         | NOTT-119            | [Cu <sub>3</sub> (BTII)(H <sub>2</sub> O) <sub>3</sub> ](DMF) <sub>35</sub> (H <sub>2</sub> O) <sub>35</sub>                                                                                                                                                                                                                          |                 | 4118                                               | N.A. <sup>[c]</sup>                                     | 2.35                                           | 315 °C <sup>[b]</sup>                                | 110 °C                                  | S20  |
| 2011         | N.A. <sup>[e]</sup> | [Zn <sub>4</sub> O(L <sup>3</sup> ) <sub>1.5</sub> ]                                                                                                                                                                                                                                                                                  | Cage            | N.A. <sup>[e]</sup>                                | N.A. <sup>[c]</sup>                                     | N.A. <sup>[c]</sup>                            | ~370 °C <sup>[b]</sup>                               | R.T. <sup>[k]</sup>                     | S21  |
|              |                     | [Zn <sub>4</sub> O(L <sup>4</sup> ) <sub>1.5</sub> ]                                                                                                                                                                                                                                                                                  |                 |                                                    |                                                         |                                                | ~380 °C <sup>[b]</sup>                               |                                         |      |
|              |                     | [Zn <sub>4</sub> O(L <sup>5</sup> ) <sub>1.5</sub> ]                                                                                                                                                                                                                                                                                  |                 |                                                    |                                                         |                                                | ~360 °C <sup>[b]</sup>                               |                                         |      |
| 2012         | PCN-53              | [Fe <sub>2</sub> O(H <sub>2</sub> O) <sub>3</sub> (BTTC) <sub>2</sub> ](DMF) <sub>10</sub>                                                                                                                                                                                                                                            | Cage            | 2817                                               | N.A. <sup>[c]</sup>                                     | 1.57                                           | ~200 °C <sup>[b]</sup>                               | 120 °C                                  | S22  |
| 2012         | PCN-105             | [Cd <sub>4</sub> Na(H <sub>2</sub> O) <sub>2</sub> (HTDBD) <sub>3</sub> (TDBD)](DMF) <sub>10</sub> (EtOH) <sub>6</sub> (H <sub>2</sub> O) <sub>3</sub>                                                                                                                                                                                | Cage            | 1067                                               | 1317                                                    | N.A. <sup>[c]</sup>                            | ~350 °C <sup>[b]</sup>                               | 60 °C                                   | S23  |
| 2012         | DUT-25              | [Zn <sub>4</sub> O(BENZTB)(BTB) <sub>2/3</sub> ](DEF) <sub>16</sub> (H <sub>2</sub> O) <sub>7/2</sub>                                                                                                                                                                                                                                 | Cage            | 4670                                               | N.A. <sup>[c]</sup>                                     | 2.22                                           | ~350 °C <sup>[b]</sup>                               | SCD <sup>[j]</sup> , 30 °C              | S24  |
| 2012         | SUMOF-1-Zn          | [Zn <sub>6</sub> (BTB) <sub>4</sub> (4,4'-bpy) <sub>3</sub> ](solvent) <sub>x</sub>                                                                                                                                                                                                                                                   | Cage            | N.A. <sup>[e]</sup>                                | N.A. <sup>[c]</sup>                                     | N.A. <sup>[c]</sup>                            | ~260 °C <sup>[b]</sup>                               | N.A. <sup>[e]</sup>                     | S25  |
|              | SUMOF-1-Co          | [Co <sub>6</sub> (BTB) <sub>4</sub> (4,4'-bpy) <sub>3</sub> ](solvent) <sub>x</sub>                                                                                                                                                                                                                                                   |                 |                                                    |                                                         |                                                | ~350 °C <sup>[b]</sup>                               |                                         |      |

Table S2 (continued)

| Publish Time | mesoMOF Code        | mesoMOF Formula <sup>[a]</sup>                                                                                                                                                      | Structural Type | BET Surface Area (m <sup>2</sup> g <sup>-1</sup> ) | Langmuir Surface Area (m <sup>2</sup> g <sup>-1</sup> ) | Pore Volume (cm <sup>3</sup> g <sup>-1</sup> ) | T <sub>max</sub> of Thermal Stability <sup>[b]</sup> | Activated T <sub>max</sub> for Sorption | Ref.                |
|--------------|---------------------|-------------------------------------------------------------------------------------------------------------------------------------------------------------------------------------|-----------------|----------------------------------------------------|---------------------------------------------------------|------------------------------------------------|------------------------------------------------------|-----------------------------------------|---------------------|
| 2012         | N.A. <sup>[c]</sup> | [Cu <sub>3</sub> (L <sup>6</sup> )]                                                                                                                                                 | Cage            | 3288                                               | N.A. <sup>[c]</sup>                                     | 1.77                                           | ~125 °C <sup>[b]</sup>                               | 100 °C                                  | S26                 |
|              |                     | [Cu <sub>3</sub> (L <sup>7</sup> )]                                                                                                                                                 |                 | 3360                                               | N.A. <sup>[c]</sup>                                     | 1.91                                           | ~125 °C <sup>[b]</sup>                               | 100 °C                                  |                     |
| 2013         | MIL-143             | [Fe <sub>3</sub> O(Cl <sup>-</sup> )(H <sub>2</sub> O) <sub>2</sub> (BDC) <sub>3/2</sub> (BTB)](solvent) <sub>n</sub>                                                               | Cage            | 2150                                               | N.A. <sup>[c]</sup>                                     | 1.18                                           | ~200 °C                                              | 100 °C                                  | S27                 |
| 2013         | N.A. <sup>[c]</sup> | [(CH <sub>3</sub> ) <sub>2</sub> NH <sub>2</sub> ] <sub>2</sub> [Zn(TATAT) <sub>2/3</sub> ](DMF) <sub>3</sub> (H <sub>2</sub> O)                                                    | Cage            | N.A. <sup>[c]</sup>                                | N.A. <sup>[c]</sup>                                     | N.A. <sup>[c]</sup>                            | N.A. <sup>[c]</sup>                                  | N.A. <sup>[c]</sup>                     | S28                 |
| 2002         | IRMOF-16            | [Zn <sub>4</sub> O(TPDC) <sub>3</sub> ](DEF) <sub>17</sub> (H <sub>2</sub> O) <sub>2</sub>                                                                                          | 3D Channel      | N.A. <sup>[c]</sup>                                | N.A. <sup>[c]</sup>                                     | N.A. <sup>[c]</sup>                            | N.A. <sup>[c]</sup>                                  | N.A. <sup>[c]</sup>                     | N.A. <sup>[c]</sup> |
|              | IRMOF-14            | [Zn <sub>4</sub> O(PDC) <sub>3</sub> ](DEF) <sub>6</sub> (H <sub>2</sub> O) <sub>5</sub>                                                                                            |                 | N.A. <sup>[c]</sup>                                | 1936                                                    | 0.69                                           | N.A. <sup>[c]</sup>                                  | 150 °C                                  |                     |
|              | IRMOF-12            | [Zn <sub>4</sub> O(HPDC) <sub>3</sub> ](DEF) <sub>10</sub> (H <sub>2</sub> O)                                                                                                       |                 | N.A. <sup>[c]</sup>                                | 1750                                                    | 0.61                                           | N.A. <sup>[c]</sup>                                  | 150 °C                                  |                     |
|              | IRMOF-10            | [Zn <sub>4</sub> O(BPDC) <sub>3</sub> ](DEF) <sub>12</sub> (H <sub>2</sub> O)                                                                                                       |                 | N.A. <sup>[c]</sup>                                | N.A. <sup>[c]</sup>                                     | N.A. <sup>[c]</sup>                            | N.A. <sup>[c]</sup>                                  | N.A. <sup>[c]</sup>                     |                     |
|              | IRMOF-8             | [Zn <sub>4</sub> O(2,6-NDC) <sub>3</sub> ](DEF) <sub>6</sub>                                                                                                                        |                 | N.A. <sup>[c]</sup>                                | N.A. <sup>[c]</sup>                                     | N.A. <sup>[c]</sup>                            | N.A. <sup>[c]</sup>                                  | N.A. <sup>[c]</sup>                     |                     |
| 2006         | mesoMOF-1           | [Cu <sub>3</sub> (TATAB) <sub>2</sub> (H <sub>2</sub> O) <sub>3</sub> ](DMF) <sub>8</sub> (H <sub>2</sub> O) <sub>9</sub>                                                           | 3D Channel      | N.A. <sup>[c]</sup>                                | N.A. <sup>[c]</sup>                                     | N.A. <sup>[c]</sup>                            | ~180 °C <sup>[b]</sup>                               | 80 °C                                   | S30                 |
| 2009         | N.A. <sup>[c]</sup> | [Cu <sub>2</sub> (L <sup>8</sup> )(H <sub>2</sub> O) <sub>2</sub> ](DMF) <sub>14</sub> (H <sub>2</sub> O) <sub>5</sub>                                                              | 3D Channel      | 1020                                               | 1127                                                    | N.A. <sup>[c]</sup>                            | ~260 °C <sup>[b]</sup>                               | Freeze-Dried Method                     | S31                 |
| 2010         | CMOF-2a             | [(R-L <sup>9a</sup> )Cu <sub>2</sub> (H <sub>2</sub> O) <sub>2</sub> ](DMF) <sub>15</sub> (H <sub>2</sub> O) <sub>11</sub>                                                          | 3D Channel      | 0                                                  | N.A. <sup>[c]</sup>                                     | N.A. <sup>[c]</sup>                            | ~200 °C <sup>[b]</sup>                               |                                         |                     |
|              | CMOF-3a             | [(R-L <sup>10a</sup> )Cu <sub>2</sub> (H <sub>2</sub> O) <sub>2</sub> ](DEF) <sub>12</sub> (H <sub>2</sub> O) <sub>16</sub>                                                         |                 | ~240                                               |                                                         |                                                | ~260 °C <sup>[b]</sup>                               |                                         |                     |
|              | CMOF-4a             | [(R-L <sup>11a</sup> )Cu <sub>2</sub> (H <sub>2</sub> O) <sub>2</sub> ](DEF) <sub>10</sub> (DMA) <sub>14</sub> (H <sub>2</sub> O) <sub>5</sub>                                      |                 | 0                                                  |                                                         |                                                | ~260 °C <sup>[b]</sup>                               |                                         |                     |
|              | CMOF-2b             | [(R-L <sup>9b</sup> )Cu <sub>2</sub> (H <sub>2</sub> O) <sub>2</sub> ](DEF) <sub>11</sub> (H <sub>2</sub> O) <sub>3</sub>                                                           |                 | 0                                                  |                                                         |                                                | ~200 °C <sup>[b]</sup>                               |                                         |                     |
|              | CMOF-3b             | [(R-L <sup>10b</sup> )Cu <sub>2</sub> (H <sub>2</sub> O) <sub>2</sub> ](DMF) <sub>13</sub> ( <sup>t</sup> PrOH) <sub>11</sub> (H <sub>2</sub> O) <sub>4.5</sub>                     |                 | 0                                                  |                                                         |                                                | ~260 °C <sup>[b]</sup>                               |                                         |                     |
|              | CMOF-4b             | [(R-L <sup>11b</sup> )Cu <sub>2</sub> (H <sub>2</sub> O) <sub>2</sub> ](DEF) <sub>6.5</sub> (DMF) <sub>19</sub> ( <sup>t</sup> PrOH) <sub>8.5</sub> (H <sub>2</sub> O) <sub>2</sub> |                 | 0                                                  |                                                         |                                                | ~250 °C <sup>[b]</sup>                               |                                         |                     |
| 2010         | CMOF-2              | [Zn <sub>4</sub> (μ <sub>4</sub> -O)(L <sup>12</sup> ) <sub>3</sub> ](DEF) <sub>22</sub> (H <sub>2</sub> O) <sub>4</sub>                                                            | 3D Channel      | N.A. <sup>[c]</sup>                                | N.A. <sup>[c]</sup>                                     | N.A. <sup>[c]</sup>                            | ~200 °C <sup>[b]</sup>                               | N.A. <sup>[c]</sup>                     | S33                 |
|              | CMOF-3              | [Zn <sub>4</sub> (μ <sub>4</sub> -O)(L <sup>13</sup> ) <sub>3</sub> ](DMF) <sub>42</sub>                                                                                            |                 |                                                    |                                                         |                                                | ~250 °C <sup>[b]</sup>                               |                                         |                     |
|              | CMOF-4              | [Zn <sub>4</sub> (μ <sub>4</sub> -O)(L <sup>13</sup> ) <sub>3</sub> ](DEF) <sub>37</sub> (EtOH) <sub>23</sub> (H <sub>2</sub> O) <sub>4</sub>                                       |                 |                                                    |                                                         |                                                | ~250 °C <sup>[b]</sup>                               |                                         |                     |

Table S2 (continued)

| Publish Time | mesoMOF Code        | mesoMOF Formula <sup>[a]</sup>                                                                                                                                                                      | Structural Type          | BET Surface Area (m <sup>2</sup> g <sup>-1</sup> ) | Langmuir Surface Area (m <sup>2</sup> g <sup>-1</sup> ) | Pore Volume (cm <sup>3</sup> g <sup>-1</sup> ) | T <sub>max</sub> of Thermal Stability <sup>[b]</sup> | Activated T <sub>max</sub> for Sorption  | Ref. |
|--------------|---------------------|-----------------------------------------------------------------------------------------------------------------------------------------------------------------------------------------------------|--------------------------|----------------------------------------------------|---------------------------------------------------------|------------------------------------------------|------------------------------------------------------|------------------------------------------|------|
| 2010         | Cd-MOF              | [Cd(NH <sub>2</sub> BDC)(4,4'-bpy)](DMF) <sub>3</sub> (H <sub>2</sub> O) <sub>4,5</sub>                                                                                                             | 3D Channel               | N.A. <sup>[c]</sup>                                | N.A. <sup>[c]</sup>                                     | N.A. <sup>[c]</sup>                            | ~240 °C <sup>[b]</sup>                               | N.A. <sup>[c]</sup>                      | S34  |
| 2012         | PCN-222(Fe)         | N.A. <sup>[c]</sup>                                                                                                                                                                                 | 3D Channel               | 2200                                               | N.A. <sup>[c]</sup>                                     | 1.56                                           | ~370 °C <sup>[b]</sup>                               | 120 °C                                   | S35  |
| 2012         | Bio-MOF-100         | [(CH <sub>3</sub> ) <sub>2</sub> NH <sub>2</sub> ] <sub>4</sub> [Zn <sub>8</sub> (AD) <sub>4</sub> (BPDC) <sub>6</sub> O <sub>2</sub> ](DMF) <sub>49</sub> (H <sub>2</sub> O) <sub>31</sub>         | 3D Channel               | 4300                                               | N.A. <sup>[c]</sup>                                     | 4.3                                            | ~350 °C <sup>[b]</sup>                               | SCD <sup>[j]</sup> , 100 °C              | S36  |
| 2013         | N.A. <sup>[c]</sup> | [(CH <sub>3</sub> ) <sub>2</sub> NH <sub>2</sub> ] <sub>2</sub> [ZnNa <sub>2</sub> (μ <sub>2</sub> -H <sub>2</sub> O) <sub>2</sub> (H <sub>2</sub> O) <sub>2</sub> (TATAT)](DMF) <sub>2</sub>       | 3D Channel               | N.A. <sup>[c]</sup>                                | N.A. <sup>[c]</sup>                                     | N.A. <sup>[c]</sup>                            | ~350 °C <sup>[b]</sup>                               | N.A. <sup>[c]</sup>                      | S28  |
| 2013         | Bio-MOF-101         | [(CH <sub>3</sub> ) <sub>2</sub> NH <sub>2</sub> ] <sub>2</sub> [Zn <sub>8</sub> (AD) <sub>4</sub> (2,6-NDC) <sub>6</sub> (OH) <sub>2</sub> ](DMF) <sub>34</sub> (H <sub>2</sub> O) <sub>13,4</sub> | 3D Channel               | 4410                                               | N.A. <sup>[c]</sup>                                     | 2.83                                           | N.A. <sup>[c]</sup>                                  | SCD <sup>[j]</sup> , R.T. <sup>[k]</sup> | S37  |
|              | Bio-MOF-102         | [(CH <sub>3</sub> ) <sub>2</sub> NH <sub>2</sub> ] <sub>2</sub> [Zn <sub>8</sub> (AD) <sub>4</sub> (ABDC) <sub>6</sub> (OH) <sub>2</sub> ]                                                          |                          | 3222                                               | N.A. <sup>[c]</sup>                                     | 4.36                                           | N.A. <sup>[c]</sup>                                  |                                          |      |
|              | Bio-MOF-103         | [(CH <sub>3</sub> ) <sub>2</sub> NH <sub>2</sub> ] <sub>2</sub> [Zn <sub>8</sub> (AD) <sub>4</sub> (NH <sub>2</sub> -TPDC) <sub>6</sub> (OH) <sub>2</sub> ]                                         |                          | 2704                                               | N.A. <sup>[c]</sup>                                     | 4.13                                           | N.A. <sup>[c]</sup>                                  |                                          |      |
| 2008         | UMCM-1              | [Zn <sub>4</sub> O(BDC)(BTB) <sub>4/3</sub> ]                                                                                                                                                       | Microcage+<br>1D Channel | 4160                                               | 6500                                                    | N.A. <sup>[c]</sup>                            | ~400 °C <sup>[b]</sup>                               | R.T. <sup>[k]</sup>                      | S38  |
| 2013         | CYCU-3              | [Al(OH)(SDC)]                                                                                                                                                                                       | Multiple<br>1D Channel   | 2757                                               | 3884                                                    | 1.39                                           | ~300 °C <sup>[b]</sup>                               | 150 °C                                   | S39  |
| 2007         | JUC-48              | [Cd <sub>3</sub> (BPDC) <sub>3</sub> (DMF)](DMF) <sub>5</sub> (H <sub>2</sub> O) <sub>18</sub>                                                                                                      | 1D Channel               | 629                                                | 880                                                     | 0.19                                           | ~380 °C <sup>[b]</sup>                               | R.T. <sup>[k]</sup>                      | S40  |
| 2012         | IRMOF-74-III        | N.A. <sup>[c]</sup>                                                                                                                                                                                 | 1D Channel               | 2440                                               | 3750                                                    | 1.23                                           | < 300 °C <sup>[b]</sup>                              | 130 °C                                   | S41  |
|              | IRMOF-74-IV         |                                                                                                                                                                                                     |                          | 2480                                               | 5370                                                    | 1.60                                           |                                                      |                                          |      |
|              | IRMOF-74-V          |                                                                                                                                                                                                     |                          | 2230                                               | 6940                                                    | 1.89                                           |                                                      |                                          |      |
|              | IRMOF-74-VI         |                                                                                                                                                                                                     |                          | 1600                                               | 5880                                                    | 1.65                                           |                                                      |                                          |      |
|              | IRMOF-74-VII        |                                                                                                                                                                                                     |                          | 1800                                               | 8320                                                    | 2.12                                           |                                                      |                                          |      |
|              | IRMOF-74-IX         |                                                                                                                                                                                                     |                          | 1920                                               | 9410                                                    | 2.51                                           |                                                      |                                          |      |
| IRMOF-74-XI  | 1760                | 9880                                                                                                                                                                                                | 3.41                     |                                                    |                                                         |                                                |                                                      |                                          |      |

**Table S2 (continued)**

| Publish Time | <i>meso</i> MOF Code | <i>meso</i> MOF Formula <sup>[a]</sup>                                           | Structural Type | BET Surface Area (m <sup>2</sup> g <sup>-1</sup> ) | Langmuir Surface Area (m <sup>2</sup> g <sup>-1</sup> ) | Pore Volume (cm <sup>3</sup> g <sup>-1</sup> ) | T <sub>max</sub> of Thermal Stability <sup>[b]</sup> | Activated T <sub>max</sub> for Sorption | Ref.      |
|--------------|----------------------|----------------------------------------------------------------------------------|-----------------|----------------------------------------------------|---------------------------------------------------------|------------------------------------------------|------------------------------------------------------|-----------------------------------------|-----------|
|              | 437-MOF              | [In(BTTB) <sub>2/3</sub> (OH)](NMF) <sub>5</sub> (H <sub>2</sub> O) <sub>4</sub> | 1D Channel      | 2379                                               | N.A. <sup>[c]</sup>                                     | 1.11                                           | Over 400°C <sup>[l]</sup>                            | 360 °C                                  | This work |

[a] **Abbreviations:** see the footnote of Table S1;

[b] Date from TGA curves;

[c] N.A. = Not Available;

[d] Data from ref. S2;

[e] Data from ref. S3;

[f] Based on the activated samples;

[g] Based on the as-synthesized samples;

[h] Data from N<sub>2</sub> isotherm;

[i] Data from Ar isotherm;

[j] **SCD** = Supercritical Carbon Dioxide;

[k] **R.T.** = Room Temperature;

[l] Data from the long-term heating treatment (at least 3h) under vacuum (< 10<sup>-3</sup> Torr at least).

**Table S3** Crystallographic data and structure refinement details for 437-MOFs.

|                                                                                                                     | <b>437-MOF</b>                                    | <b>437-MOF-CH<sub>2</sub>Cl<sub>2</sub></b>       | <b>437-MOF-boiling water</b>                      |
|---------------------------------------------------------------------------------------------------------------------|---------------------------------------------------|---------------------------------------------------|---------------------------------------------------|
| Empirical formula                                                                                                   | C <sub>18</sub> H <sub>11</sub> O <sub>7</sub> In | C <sub>18</sub> H <sub>11</sub> O <sub>7</sub> In | C <sub>18</sub> H <sub>11</sub> O <sub>7</sub> In |
| Formula weight                                                                                                      | 454.09                                            | 454.09                                            | 454.09                                            |
| Crystal system                                                                                                      | Hexagonal                                         | Hexagonal                                         | Hexagonal                                         |
| Space group                                                                                                         | <i>P6<sub>3</sub>/mcm</i>                         | <i>P6<sub>3</sub>/mcm</i>                         | <i>P6<sub>3</sub>/mcm</i>                         |
| Crystal size (mm <sup>3</sup> )                                                                                     | 0.28 × 0.10 × 0.09                                | 0.22 × 0.11 × 0.10                                | 0.24 × 0.12 × 0.10                                |
| <i>a</i> (Å)                                                                                                        | 32.3006(7)                                        | 32.182(2)                                         | 32.2297(13)                                       |
| <i>b</i> (Å)                                                                                                        | 32.3006(7)                                        | 32.182(2)                                         | 32.2297(13)                                       |
| <i>c</i> (Å)                                                                                                        | 7.2707(2)                                         | 7.2741(4)                                         | 7.2618(4)                                         |
| Volume (Å <sup>3</sup> )                                                                                            | 6569.4(3)                                         | 6524.5(7)                                         | 6532.6(5)                                         |
| <i>Z</i>                                                                                                            | 6                                                 | 6                                                 | 6                                                 |
| <i>D</i> (g cm <sup>-3</sup> )                                                                                      | 0.689                                             | 0.693                                             | 0.693                                             |
| $\mu$ (mm <sup>-1</sup> )                                                                                           | 4.453                                             | 4.483                                             | 4.478                                             |
| <i>F</i> (000)                                                                                                      | 1344                                              | 1344                                              | 1344                                              |
| <i>R</i> <sub>int</sub>                                                                                             | 0.1070                                            | 0.0763                                            | 0.1032                                            |
| Goodness-of-fit on <i>F</i> <sup>2</sup>                                                                            | 1.138                                             | 1.299                                             | 1.039                                             |
| <i>R</i> <sub>1</sub> <sup><i>a</i></sup> / <i>wR</i> <sub>2</sub> <sup><i>b</i></sup> [ <i>I</i> > 2σ( <i>I</i> )] | 0.0936 / 0.1934                                   | 0.1676 / 0.4097                                   | 0.1063 / 0.2962                                   |
| <i>R</i> <sub>1</sub> <sup><i>a</i></sup> / <i>wR</i> <sub>2</sub> <sup><i>b</i></sup> (all data)                   | 0.1109 / 0.2003                                   | 0.2002 / 0.4309                                   | 0.1687 / 0.3410                                   |
| CCDC number                                                                                                         | 952936                                            | 952937                                            | 952938                                            |

<sup>*a*</sup>  $R_1 = \sum ||F_o| - |F_c|| / \sum |F_o|$ . <sup>*b*</sup>  $wR_2 = [\sum w(|F_o|^2 - |F_c|^2) / \sum w(F_o)^2]^{1/2}$ , where  $w = 1 / [\sigma^2(F_o^2) + (aP)^2 + bP]$ .  $P = (F_o^2 + 2F_c^2) / 3$ .

**Table S4** Comparison of the selected bond lengths (Å) and angles (°) for 437-MOFs.<sup>a</sup>

|                         | <b>437-MOF</b> | <b>437-MOF-CH<sub>2</sub>Cl<sub>2</sub></b> | <b>437-MOF-boiling water</b> |
|-------------------------|----------------|---------------------------------------------|------------------------------|
| In1–O1                  | 2.167(5)       | 2.152(17)                                   | 2.153(5)                     |
| In1–O2                  | 2.075(6)       | 2.115(13)                                   | 2.085(6)                     |
| O1–In1–O2               | 90.3(2)        | 89.9(5)                                     | 90.2(2)                      |
| O1–In1–O1 <sup>#1</sup> | 94.7(3)        | 97.7(10)                                    | 94.6(3)                      |

<sup>a</sup> Symmetry code: #1 =  $x - y + 1, -y + 2, z$ .

**Table S5** Structural features of the reported trigonal carboxylate ligands.<sup>a</sup>

| Trigonal ligands                                                                                            | $\alpha$ , $\beta$ , and $\gamma$ ( $^\circ$ ) <sup>a</sup>                                                                                   | Ref.                                      |
|-------------------------------------------------------------------------------------------------------------|-----------------------------------------------------------------------------------------------------------------------------------------------|-------------------------------------------|
| 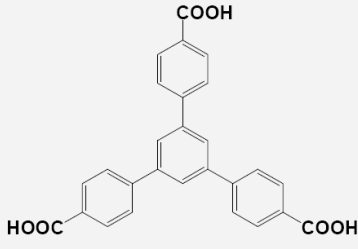 <p>H<sub>3</sub>BTB</p>   | $(\alpha_1, \alpha_2, \alpha_3)$ : 0~83.5°<br>$(\beta_1, \beta_2, \beta_3)$ : 0~81.3°<br>$(\gamma_1, \gamma_2, \gamma_3)$ : 118.7~123.9°      | S7<br>S12<br>S24<br>S25<br>S38<br>S46–S88 |
|  <p>H<sub>3</sub>TATB</p> | $(\alpha_1, \alpha_2, \alpha_3)$ : 0.5~4.8°<br>$(\beta_1, \beta_2, \beta_3)$ : 2.1~4.1°<br>$(\gamma_1, \gamma_2, \gamma_3)$ : 119.2~119.9°    | S89–S91                                   |
|  <p>H<sub>3</sub>BTE</p> | $(\alpha_1, \alpha_2, \alpha_3)$ : 4.2~20.6°<br>$(\beta_1, \beta_2, \beta_3)$ : 12.6~22.6°<br>$(\gamma_1, \gamma_2, \gamma_3)$ : 110.6~123.1° | S12<br>S57<br>S92                         |
|  <p>H<sub>3</sub>BBC</p> | $(\alpha_1, \alpha_2, \alpha_3)$ : 2.1~83.5°<br>$(\beta_1, \beta_2, \beta_3)$ : 4.9~81.3°<br>$(\gamma_1, \gamma_2, \gamma_3)$ : 111.9~123.9°  | S12<br>S51<br>S93                         |

| Trigonal ligands                                                                                              | $\alpha$ , $\beta$ , and $\gamma$ ( $^\circ$ ) <sup>a</sup>                                                                                                            | Ref.             |
|---------------------------------------------------------------------------------------------------------------|------------------------------------------------------------------------------------------------------------------------------------------------------------------------|------------------|
| 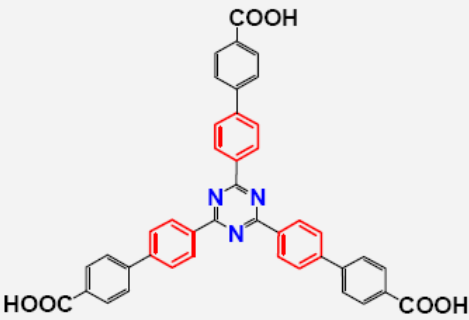                             | $(\alpha_1, \alpha_2, \alpha_3): 27.9\sim 44.9^\circ$<br>$(\beta_1, \beta_2, \beta_3): 29.4\sim 39.2^\circ$<br>$(\gamma_1, \gamma_2, \gamma_3): 118.9\sim 121.7^\circ$ | S51              |
| <p>H<sub>3</sub>TAPB</p>    | $\alpha_1 = \alpha_2 = \alpha_3 = 30.7^\circ$<br>$\beta_1 = \beta_2 = \beta_3 = 36.5^\circ$<br>$(\gamma_1, \gamma_2, \gamma_3): 117.5\sim 120.7^\circ$                 | S16              |
| <p>H<sub>3</sub>BTATB</p>  | $(\alpha_1, \alpha_2, \alpha_3): 15.1\sim 21.1^\circ$<br>$(\beta_1, \beta_2, \beta_3): 19.5\sim 25.6^\circ$<br>$(\gamma_1, \gamma_2, \gamma_3): 119.5\sim 119.9^\circ$ | S16<br>S30       |
| <p>H<sub>3</sub>TATAB</p>  | $\alpha_1 = \alpha_2 = \alpha_3 = 90^\circ$<br>$\beta_1 = \beta_2 = \beta_3 = 90^\circ$<br>$\gamma_1 = \gamma_2 = \gamma_3 = 120^\circ$                                | <b>This work</b> |
| <p>H<sub>3</sub>BTTB</p>                                                                                      |                                                                                                                                                                        |                  |

<sup>a</sup> For definitions of  $\alpha$ ,  $\beta$ , and  $\gamma$ , please refer to the captions for Fig. S6 and Fig. S7.



**Table S6** Sorption parameters of 437-MOF samples from N<sub>2</sub> isotherms.

| Sample                   | N <sub>2</sub> uptake<br>(STP cm <sup>3</sup> g <sup>-1</sup> ) <sup>a</sup> | BET surface area<br>(m <sup>2</sup> g <sup>-1</sup> ) <sup>b</sup> | Pore volume<br>(cm <sup>3</sup> g <sup>-1</sup> ) <sup>c</sup> |
|--------------------------|------------------------------------------------------------------------------|--------------------------------------------------------------------|----------------------------------------------------------------|
| 437-MOF-80               | 596                                                                          | 1576                                                               | 0.92                                                           |
| 437-MOF-240              | 646                                                                          | 1791                                                               | 1.00                                                           |
| 437-MOF-360              | 600                                                                          | 1533                                                               | 0.93                                                           |
| 437-MOF-boiling water    | 723                                                                          | 2379                                                               | 1.11                                                           |
| 437-MOF-boiling water-3h | 576                                                                          | 1037                                                               | 0.88                                                           |

<sup>a</sup> The maximum uptake. <sup>b</sup> Calculated using N<sub>2</sub> adsorption data in the relative pressure ranging from 0.12 to 0.17. <sup>c</sup> Calculated by single point method from the amount of N<sub>2</sub> adsorb at maximum relative pressure.

**Table S7** Sorption parameters of 437-MOF samples from Ar, O<sub>2</sub>, and CO<sub>2</sub> isotherms.

| Sample                   | Ar Uptake<br>(STP cm <sup>3</sup> g <sup>-1</sup> ) <sup>a</sup> | O <sub>2</sub> Uptake<br>(STP cm <sup>3</sup> g <sup>-1</sup> ) <sup>a</sup> | CO <sub>2</sub> Uptake<br>(STP cm <sup>3</sup> g <sup>-1</sup> ) <sup>a</sup> |
|--------------------------|------------------------------------------------------------------|------------------------------------------------------------------------------|-------------------------------------------------------------------------------|
| 437-MOF-80               | 704                                                              | 728                                                                          | 421                                                                           |
| 437-MOF-240              | 734                                                              | 722                                                                          | 454                                                                           |
| 437-MOF-360              | 684                                                              | 690                                                                          | 359                                                                           |
| 437-MOF-boiling water    | 788                                                              | 803                                                                          | 607                                                                           |
| 437-MOF-boiling water-3h | 598                                                              | 689                                                                          | 285                                                                           |

<sup>a</sup> The maximum uptake.

**Table S8** The adsorption information and thermal stability of representative In(III)-based MOFs.

| Publish Time | MOF Code                            | MOF Formula <sup>[a]</sup>                                                                                                                                             | Pore Level | BET Surface Area (m <sup>2</sup> g <sup>-1</sup> ) | Langmuir Surface Area (m <sup>2</sup> g <sup>-1</sup> ) | Pore Volume (cm <sup>3</sup> g <sup>-1</sup> ) | Accessible Void               | T <sub>max</sub> of Thermal Stability <sup>[b]</sup> | Activated T <sub>max</sub> for Sorption | Ref. |
|--------------|-------------------------------------|------------------------------------------------------------------------------------------------------------------------------------------------------------------------|------------|----------------------------------------------------|---------------------------------------------------------|------------------------------------------------|-------------------------------|------------------------------------------------------|-----------------------------------------|------|
| 2002         | QMOF-2                              | [InH(BDC) <sub>2</sub> ]                                                                                                                                               | Micro-     | 190                                                | N.A. <sup>[c]</sup>                                     | N.A. <sup>[c]</sup>                            | N.A. <sup>[c]</sup>           | ~270 °C <sup>[b]</sup>                               | N.A. <sup>[c]</sup>                     | S95  |
| 2006         | Na <sup>+</sup> -exchanged rho-ZMOF | [Na <sup>+</sup> <sub>48</sub> (H <sub>2</sub> O) <sub>282</sub> ][In <sub>48</sub> (HImDC) <sub>96</sub> ]                                                            | Micro-     | N.A. <sup>[c]</sup>                                | 1067                                                    | N.A. <sup>[c]</sup>                            | N.A. <sup>[c]</sup>           | N.A. <sup>[c]</sup>                                  | 105 °C                                  | S96  |
| 2007         | N.A. <sup>[c]</sup>                 | [In <sub>3</sub> O(L <sup>1</sup> ) <sub>1.5</sub> (H <sub>2</sub> O) <sub>3</sub> ](H <sub>2</sub> O) <sub>3</sub> (NO <sub>3</sub> )                                 | Micro-     | N.A. <sup>[c]</sup>                                | 1417                                                    | 0.50                                           | 57.2 %                        | N.A. <sup>[c]</sup>                                  | N.A. <sup>[c]</sup>                     | S97  |
| 2008         | usf-ZMOF                            | [In <sub>5</sub> (HImDC) <sub>10</sub> ](1,2-H <sub>2</sub> DACH) <sub>2.5</sub> (DMF) <sub>3</sub> (CH <sub>3</sub> CN) <sub>2</sub> (H <sub>2</sub> O) <sub>10</sub> | Micro-     | N.A. <sup>[c]</sup>                                | 520                                                     | 0.20                                           | 50 %                          | ~240 °C                                              | N.A. <sup>[c]</sup>                     | S98  |
| 2008         | N.A. <sup>[c]</sup>                 | [In(OH)(HIPPB)]                                                                                                                                                        | Micro-     | 215                                                | N.A. <sup>[c]</sup>                                     | N.A. <sup>[c]</sup>                            | 18 %                          | ~450 °C                                              | 250 °C                                  | S99  |
| 2008         | MIL-68(In)                          | [In(OH)(BDC)]                                                                                                                                                          | Micro-     | 746                                                | 1139                                                    | 0.44                                           | N.A. <sup>[c]</sup>           | ~350 °C                                              | 150 °C                                  | S100 |
| 2008         | ATF-1                               | [(CH <sub>3</sub> ) <sub>2</sub> NH <sub>2</sub> ][In(THB) <sub>2</sub> ](DMF) <sub>x</sub>                                                                            | Micro-     | N.A. <sup>[c]</sup>                                | 360.3                                                   | 0.126                                          | 50.2 %                        | ~300 °C                                              | 150 °C                                  | S101 |
| 2008         | N.A. <sup>[c]</sup>                 | [(CH <sub>3</sub> ) <sub>2</sub> NH <sub>2</sub> ][In(L <sup>3</sup> )                                                                                                 | Micro-     | 820                                                | N.A. <sup>[c]</sup>                                     | 0.326                                          | ~56 %                         | ~390 °C                                              | 180 °C                                  | S102 |
| 2008         | N.A. <sup>[c]</sup>                 | [Li <sup>+</sup> ][In(L <sup>3</sup> )                                                                                                                                 |            | 1024                                               |                                                         | 0.419                                          | N.A. <sup>[c]</sup>           | ~390 °C                                              | 180 °C                                  |      |
| 2008         | sod-ZMOF                            | [In(4,6-PmDC) <sub>2</sub> Na <sub>0.36</sub> K <sub>1.28</sub> ](NO <sub>3</sub> ) <sub>0.64</sub> (H <sub>2</sub> O) <sub>2.1</sub>                                  | Micro-     | N.A. <sup>[c]</sup>                                | 616                                                     | 0.245                                          | 46 %                          | N.A. <sup>[c]</sup>                                  | R.T. <sup>[d]</sup>                     | S103 |
| 2009         | MOC-2                               | [In <sub>8</sub> (HImDC) <sub>12</sub> ](DMF) <sub>6</sub>                                                                                                             | Micro-     | N.A. <sup>[c]</sup>                                | 1420                                                    | 0.535                                          | 56.1 %                        | ~320 °C                                              | 135 °C                                  | S104 |
|              | MOC-3                               | [NH <sub>4</sub> ][In <sub>8</sub> (HImDC) <sub>12</sub> ][In <sub>8</sub> (HImDC) <sub>11</sub> (ImDC)]                                                               |            |                                                    | 456                                                     | 0.1733                                         | ~31 %                         | ~320 °C                                              | 135 °C                                  |      |
| 2009         | N.A. <sup>[c]</sup>                 | (choline) <sub>3</sub> [In <sub>3</sub> (BTC) <sub>4</sub> ](DMF) <sub>2</sub> (Et <sub>4</sub> N) <sub>3</sub> [In <sub>3</sub> (BTC) <sub>4</sub> ](DEF)             | Micro-     | 507.8<br>206.9                                     | 711.8<br>291.8                                          | N.A. <sup>[c]</sup>                            | 66.2 %<br>N.A. <sup>[c]</sup> | <300°C<br>~380 °C                                    | 100 °C<br>200 °C                        | S105 |
| 2009         | NOTT-200                            | [H <sub>2</sub> PPZ][In <sub>2</sub> (L <sup>3</sup> ) <sub>2</sub> ](DMF) <sub>3.5</sub> (H <sub>2</sub> O) <sub>5</sub>                                              | Micro-     | 180                                                | N.A. <sup>[c]</sup>                                     | 0.136                                          | 35 %                          | ~400 °C                                              | 120 °C                                  | S106 |
| 2009         | NOTT-201                            | [L <sub>1.5</sub> (H <sub>3</sub> O) <sub>0.5</sub> ][In <sub>2</sub> (L <sup>3</sup> ) <sub>2</sub> ](H <sub>2</sub> O) <sub>11</sub>                                 |            | 580                                                |                                                         | 0.239                                          | 42 %                          | ~400 °C                                              | 120 °C                                  |      |
| 2009         | N.A. <sup>[c]</sup>                 | [Et <sub>2</sub> NH <sub>2</sub> ][In(2,6-NDC) <sub>2</sub> ](H <sub>2</sub> O) <sub>2</sub> (DEF)                                                                     | Micro-     | 891.2 <sup>[e]</sup><br>247 <sup>[f]</sup>         | 1233.9 <sup>[e]</sup>                                   | 0.50 <sup>[e]</sup><br>0.17 <sup>[f]</sup>     | 48.1 %                        | ~400 °C                                              | 120 °C                                  | S107 |
| 2010         | N.A. <sup>[c]</sup>                 | [In <sub>2</sub> (OH) <sub>2</sub> (TBAPy)](guests)                                                                                                                    | Micro-     | 1189                                               | 1475                                                    | 0.639                                          | 54 %                          | ~380 °C                                              | 150 °C                                  | S108 |

Table S8 (continued)

| Publish Time | MOF Code               | MOF Formula <sup>[a]</sup>                                                                                                                                                                                                        | Pore Level | BET Surface Area (m <sup>2</sup> g <sup>-1</sup> ) | Langmuir Surface Area (m <sup>2</sup> g <sup>-1</sup> ) | Pore Volume (cm <sup>3</sup> g <sup>-1</sup> ) | Accessible Void     | T <sub>max</sub> of Thermal Stability <sup>[b]</sup> | Activated T <sub>max</sub> for Sorption | Ref. |
|--------------|------------------------|-----------------------------------------------------------------------------------------------------------------------------------------------------------------------------------------------------------------------------------|------------|----------------------------------------------------|---------------------------------------------------------|------------------------------------------------|---------------------|------------------------------------------------------|-----------------------------------------|------|
| 2010         | N.A. <sup>[c]</sup>    | [(In <sub>3</sub> O)(OH)(ADC) <sub>2</sub> (IN) <sub>2</sub> ](H <sub>2</sub> O) <sub>4.67</sub>                                                                                                                                  | Meso-      | 1496                                               | 1857                                                    | N.A. <sup>[c]</sup>                            | 68.2 %              | ~350 °C                                              | 100 °C                                  | S17  |
| 2010         | ZSA-2                  | [K <sub>3</sub> (NO <sub>3</sub> ) <sub>3</sub> (H <sub>2</sub> O) <sub>2.5</sub> (CH <sub>3</sub> CN) <sub>3</sub> ][In <sub>4</sub> (1,2-DACH) <sub>4</sub> (TzDC) <sub>4</sub> ]                                               | Micro-     | 395                                                | N.A. <sup>[c]</sup>                                     | 0.19                                           | 34.2 %              | ~300 °C                                              | 85 °C                                   | S109 |
| 2010         | CPM-5                  | [(CH <sub>3</sub> ) <sub>2</sub> NH <sub>2</sub> ][In <sub>3</sub> O(BTC) <sub>2</sub> (H <sub>2</sub> O) <sub>3</sub> ] <sub>2</sub><br>[In <sub>3</sub> (BTC) <sub>4</sub> ](DMF) <sub>7</sub> (H <sub>2</sub> O) <sub>23</sub> | Micro-     | 580                                                | 733                                                     | 0.258                                          | 47.9 %              | ~320 °C                                              | 230 °C                                  | S110 |
|              | CPM-6                  | [CH <sub>3</sub> NH <sub>3</sub> ][In <sub>3</sub> O(BTC) <sub>2</sub> (H <sub>2</sub> O) <sub>3</sub> ] <sub>2</sub><br>[In <sub>3</sub> (BTC) <sub>4</sub> ](solvents)                                                          |            | 596                                                | 931                                                     | N.A. <sup>[c]</sup>                            | N.A. <sup>[c]</sup> | N.A. <sup>[c]</sup>                                  | 230 °C                                  |      |
| 2010         | JUC-77                 | [In(OH)(OBA)](DMF)                                                                                                                                                                                                                | Micro-     | 976                                                | 1066                                                    | N.A. <sup>[c]</sup>                            | N.A. <sup>[c]</sup> | ~350 °C                                              | 90 °C                                   | S111 |
| 2011         | CPM-13                 | [CH <sub>3</sub> NH <sub>3</sub> ]<br>[In <sub>3</sub> O(BBDC) <sub>3</sub> (HCO <sub>2</sub> ) <sub>3/2</sub> (H <sub>2</sub> O)] <sub>2</sub> (solvent)                                                                         | Micro-     | 904                                                | 1441                                                    | 0.487                                          | 62.8 %              | ~400 °C                                              | 200 °C                                  | S61  |
| 2011         | N.A. <sup>[c]</sup>    | [In <sub>2</sub> (OH) <sub>2</sub> (OBA) <sub>2</sub> ](DMF) <sub>2</sub>                                                                                                                                                         | Micro-     | 354.1                                              | 518.5                                                   | N.A. <sup>[c]</sup>                            | 47.7 %              | N.A. <sup>[c]</sup>                                  | 180 °C                                  | S112 |
| 2011         | NOTT-207               | Li <sub>1.2</sub> (H <sub>3</sub> O) <sub>0.8</sub> [In <sub>2</sub> (L <sup>4</sup> ) <sub>2</sub> ](H <sub>2</sub> O) <sub>14</sub>                                                                                             | Micro-     | 474                                                | N.A. <sup>[c]</sup>                                     | 0.206                                          | 40 %                | ~400 °C                                              | 120 °C                                  | S113 |
|              | NOTT-208               | [H <sub>2</sub> PPZ][In <sub>2</sub> (L <sup>5</sup> ) <sub>2</sub> ](DMF) <sub>4</sub> (H <sub>2</sub> O) <sub>5.5</sub>                                                                                                         |            | 687                                                |                                                         | 0.287                                          | 39 %                | ~400 °C                                              | 120 °C                                  |      |
|              | NOTT-209               | Li <sub>1.4</sub> (H <sub>3</sub> O) <sub>0.6</sub> [In <sub>2</sub> (L <sup>5</sup> ) <sub>2</sub> ](acetone) <sub>4</sub> (H <sub>2</sub> O) <sub>11</sub>                                                                      |            | 729                                                |                                                         | 0.303                                          | 43 %                | ~400 °C                                              | 120 °C                                  |      |
| 2011         | N.A. <sup>[c]</sup>    | [InH(D-CAM) <sub>2</sub> ]                                                                                                                                                                                                        | Micro-     | 497                                                | 607                                                     | 0.132                                          | 49.3 %              | ~240 °C                                              | 80 °C                                   | S114 |
| 2012         | In-soc-MOF             | [In <sub>3</sub> O(ABTC) <sub>1.5</sub> (H <sub>2</sub> O) <sub>3</sub> ](H <sub>2</sub> O) <sub>3</sub> (NO <sub>3</sub> )                                                                                                       | Micro-     | 970                                                | 1180                                                    | 0.37                                           | N.A. <sup>[c]</sup> | N.A. <sup>[c]</sup>                                  | N.A. <sup>[c]</sup>                     | S115 |
| 2012         | JUC-120<br>MIL-100(In) | N.A. <sup>[c]</sup>                                                                                                                                                                                                               | Meso-      | 1456                                               | N.A. <sup>[c]</sup>                                     | 0.636                                          | N.A. <sup>[c]</sup> | ~400 °C                                              | 150 °C                                  | S116 |
| 2012         | N.A. <sup>[c]</sup>    | [(CH <sub>3</sub> ) <sub>2</sub> NH <sub>2</sub> ][In(NH <sub>2</sub> BDC) <sub>2</sub> ](DMF)(H <sub>2</sub> O)                                                                                                                  | Micro-     | 573                                                | 633                                                     | N.A. <sup>[c]</sup>                            | N.A. <sup>[c]</sup> | ~240 °C                                              | 80 °C                                   | S117 |
| 2012         | N.A. <sup>[c]</sup>    | [(CH <sub>3</sub> ) <sub>2</sub> NH <sub>2</sub> ][In(BPDC) <sub>2</sub> ](DMF) <sub>4</sub> (H <sub>2</sub> O) <sub>2</sub>                                                                                                      | Micro-     | 638                                                | 717                                                     | 0.32                                           | 45.1 %              | ~320 °C                                              | 40 °C                                   | S118 |

**Table S8 (continued)**

| Publish Time | MOF Code            | MOF Formula <sup>[a]</sup>                                                                                                                                                                                                                                                                                      | Pore Level | BET Surface Area (m <sup>2</sup> g <sup>-1</sup> ) | Langmuir Surface Area (m <sup>2</sup> g <sup>-1</sup> ) | Pore Volume (cm <sup>3</sup> g <sup>-1</sup> ) | Accessible void     | T <sub>max</sub> of Thermal Stability <sup>[b]</sup> | Activated T <sub>max</sub> for Sorption | Ref. |
|--------------|---------------------|-----------------------------------------------------------------------------------------------------------------------------------------------------------------------------------------------------------------------------------------------------------------------------------------------------------------|------------|----------------------------------------------------|---------------------------------------------------------|------------------------------------------------|---------------------|------------------------------------------------------|-----------------------------------------|------|
| 2012         | CPM-19-Nd           | [In <sub>3</sub> Nd <sub>2</sub> O(OH) <sub>3</sub> (BTB) <sub>3</sub> (H <sub>2</sub> O) <sub>6</sub> ](NO <sub>3</sub> )(solvent)                                                                                                                                                                             | Micro-     | 272                                                | 370                                                     | 0.133                                          | 72.8 %              | ~200 °C                                              | 150 °C                                  | S70  |
|              | CPM-20              | [InCo <sub>2</sub> (OH)(IN) <sub>3</sub> (BDC) <sub>3/2</sub> ](solvent)                                                                                                                                                                                                                                        |            | 1009                                               | 1134                                                    | 0.404                                          | N.A. <sup>[c]</sup> | ~300 °C                                              | 260 °C                                  |      |
| 2012         | N.A. <sup>[c]</sup> | [(CH <sub>3</sub> ) <sub>2</sub> NH <sub>2</sub> ][In(L <sup>6</sup> )](DMA) <sub>3</sub> (H <sub>2</sub> O) <sub>2</sub>                                                                                                                                                                                       | Micro-     | 19.35 <sup>[d]</sup> /8.12 <sup>[h]</sup>          | 30.38 <sup>[d]</sup> /19.45 <sup>[h]</sup>              | N.A. <sup>[c]</sup>                            | 70.3 %              | ~320 °C                                              | 40 °C/80 °C                             | S119 |
|              |                     | [TMA][In(L <sup>6</sup> )](H <sub>2</sub> O) <sub>10.5</sub>                                                                                                                                                                                                                                                    |            | 13.67                                              | 21.35                                                   |                                                | N.A. <sup>[c]</sup> |                                                      | 80 °C                                   |      |
|              |                     | [TEA][In(L <sup>6</sup> )](H <sub>2</sub> O) <sub>7</sub>                                                                                                                                                                                                                                                       |            | 5.81                                               | 13.63                                                   |                                                | N.A. <sup>[c]</sup> |                                                      | 80 °C                                   |      |
|              |                     | [TPA][In(L <sup>6</sup> )](H <sub>2</sub> O) <sub>3.5</sub>                                                                                                                                                                                                                                                     |            | 37.41                                              | 57.05                                                   |                                                | N.A. <sup>[c]</sup> |                                                      | 80 °C                                   |      |
|              |                     | [TBA][In(L <sup>6</sup> )](H <sub>2</sub> O) <sub>2.5</sub>                                                                                                                                                                                                                                                     |            | 325.65                                             | 477.77                                                  |                                                | N.A. <sup>[c]</sup> |                                                      | 80 °C                                   |      |
|              |                     | [(CH <sub>3</sub> ) <sub>2</sub> NH <sub>2</sub> ] <sub>2</sub> [In <sub>2</sub> (L <sup>7</sup> )](DMA) <sub>3</sub> (H <sub>2</sub> O) <sub>2</sub>                                                                                                                                                           |            | 83.39 <sup>[d]</sup> /97.77 <sup>[h]</sup>         | 794.80 <sup>[d]</sup> /816.56 <sup>[h]</sup>            |                                                | 65.7 %              |                                                      | 40 °C/80 °C                             |      |
|              |                     | [TMA] <sub>2</sub> [In <sub>2</sub> (L <sup>7</sup> )](H <sub>2</sub> O) <sub>19</sub>                                                                                                                                                                                                                          |            | 13.40                                              | 22.55                                                   |                                                | N.A. <sup>[c]</sup> |                                                      | 80 °C                                   |      |
|              |                     | [TEA] <sub>2</sub> [In <sub>2</sub> (L <sup>7</sup> )](H <sub>2</sub> O) <sub>18</sub>                                                                                                                                                                                                                          |            | 754.63                                             | 1099.46                                                 |                                                | N.A. <sup>[c]</sup> |                                                      | 80 °C                                   |      |
|              |                     | [TPA] <sub>2</sub> [In <sub>2</sub> (L <sup>7</sup> )](H <sub>2</sub> O) <sub>13</sub>                                                                                                                                                                                                                          |            | 36.26                                              | 54.17                                                   |                                                | N.A. <sup>[c]</sup> |                                                      | 80 °C                                   |      |
|              |                     | [(CH <sub>3</sub> ) <sub>2</sub> NH <sub>2</sub> ][TBA][In <sub>2</sub> (L <sup>7</sup> )](H <sub>2</sub> O) <sub>15</sub>                                                                                                                                                                                      |            | 120.76                                             | 181.45                                                  |                                                | N.A. <sup>[c]</sup> |                                                      | 80 °C                                   |      |
| 2012         | CPM-15-Mg           | [(CH <sub>3</sub> ) <sub>2</sub> NH <sub>2</sub> ] <sub>4</sub> [In <sub>6</sub> (BTC) <sub>12</sub> ] <sub>2</sub><br>[(Mg <sub>3</sub> OH) <sub>4</sub> (H <sub>2</sub> O) <sub>36</sub> ]<br>[(In <sub>2</sub> MgO) <sub>4</sub> (BTC) <sub>4</sub> (H <sub>2</sub> O) <sub>12</sub> ](solvent) <sub>x</sub> | Micro-     | 398                                                | 474                                                     | 0.169                                          | N.A. <sup>[c]</sup> | ~300 °C                                              | 260 °C                                  | S120 |
|              | CPM-15-Co           | [(CH <sub>3</sub> ) <sub>2</sub> NH <sub>2</sub> ] <sub>4</sub> [In <sub>6</sub> (BTC) <sub>12</sub> ] <sub>2</sub><br>[(Co <sub>3</sub> OH) <sub>4</sub> (H <sub>2</sub> O) <sub>36</sub> ]<br>[(In <sub>2</sub> CoO) <sub>4</sub> (BTC) <sub>4</sub> (H <sub>2</sub> O) <sub>12</sub> ](solvent) <sub>x</sub> |            | 344                                                | 563                                                     | 0.181                                          | N.A. <sup>[c]</sup> | ~300 °C                                              | 260 °C                                  |      |
| 2012         | CPM-15-Ni           | [(CH <sub>3</sub> ) <sub>2</sub> NH <sub>2</sub> ] <sub>4</sub> [In <sub>6</sub> (BTC) <sub>12</sub> ] <sub>2</sub><br>[(Ni <sub>3</sub> OH) <sub>4</sub> (H <sub>2</sub> O) <sub>36</sub> ]<br>[(In <sub>2</sub> NiO) <sub>4</sub> (BTC) <sub>4</sub> (H <sub>2</sub> O) <sub>12</sub> ](solvent) <sub>x</sub> | Micro-     | 263                                                | 356                                                     | 0.128                                          | N.A. <sup>[c]</sup> | ~300 °C                                              | 260 °C                                  |      |
| 2012         | N.A. <sup>[c]</sup> | [In <sub>3</sub> O(BPDC) <sub>3</sub> (HCOO)(H <sub>2</sub> O) <sub>1.5</sub> ](DMF) <sub>x</sub>                                                                                                                                                                                                               | Micro-     | 1244.4                                             | 1785.13                                                 | 0.628                                          | 62.6 %              | ~220 °C                                              | 60 °C                                   | S121 |
| 2012         | NOTT-202            | [(CH <sub>3</sub> ) <sub>2</sub> NH <sub>2</sub> ] <sub>1.75</sub> [In(L <sup>8</sup> ) <sub>11.75</sub> ](DMF) <sub>12</sub> (H <sub>2</sub> O) <sub>10</sub>                                                                                                                                                  | Micro-     | 2220                                               | N.A. <sup>[c]</sup>                                     | 0.953                                          | 70 %                | ~380 °C                                              | 100 °C                                  | S122 |

**Table S8 (continued)**

| <i>Publish Time</i> | MOF Code            | MOF Formula <sup>[a]</sup>                                                                                                                           | Pore Level | BET Surface Area (m <sup>2</sup> g <sup>-1</sup> ) | Langmuir Surface Area (m <sup>2</sup> g <sup>-1</sup> ) | Pore Volume (cm <sup>3</sup> g <sup>-1</sup> ) | Accessible void | <i>T</i> <sub>max</sub> of Thermal Stability <sup>[b]</sup> | Activated <i>T</i> <sub>max</sub> for Sorption | <i>Ref.</i> |
|---------------------|---------------------|------------------------------------------------------------------------------------------------------------------------------------------------------|------------|----------------------------------------------------|---------------------------------------------------------|------------------------------------------------|-----------------|-------------------------------------------------------------|------------------------------------------------|-------------|
| 2012                | InOF-1              | [In <sub>2</sub> (OH) <sub>2</sub> (BPTC)](H <sub>2</sub> O) <sub>6</sub>                                                                            | Micro-     | 1065                                               | 1093                                                    | 0.37                                           | 48.9 %          | ~350 °C                                                     | N.A. <sup>[c]</sup>                            | S123        |
| 2012                | JUC-101             | (In <sub>3</sub> O)(TDCPB)(H <sub>2</sub> O) <sub>3</sub> (guest) <sub>x</sub>                                                                       | Micro-     | 3742                                               | 4202                                                    | 1.409                                          | 78.6 %          | ~300 °C                                                     | 80 °C                                          | S124        |
| 2013                | N.A. <sup>[c]</sup> | [(CH <sub>3</sub> ) <sub>2</sub> NH <sub>2</sub> ] <sub>2</sub> [In <sub>2</sub> L <sup>7</sup> ](DMF) <sub>4</sub> (H <sub>2</sub> O) <sub>16</sub> | Micro-     | 752                                                | 991                                                     | N.A. <sup>[c]</sup>                            | 43.9 %          | ~400 °C                                                     | 80 °C                                          | S125        |
| 2013                | N.A. <sup>[c]</sup> | [(CH <sub>3</sub> ) <sub>2</sub> NH <sub>2</sub> ][In <sub>2</sub> L <sup>7</sup> ](DMF) <sub>9</sub> (H <sub>2</sub> O) <sub>5</sub>                | Micro-     | 1555                                               | 1707                                                    | 0.62                                           | 65.1 %          | <300°C                                                      | SCD <sup>[i]</sup> +40 °C                      | S126        |
|                     | 437-MOF             | [In(BTTB) <sub>2/3</sub> (OH)](NMF) <sub>5</sub> (H <sub>2</sub> O) <sub>4</sub>                                                                     | Meso-      | 2379                                               | N.A. <sup>[c]</sup>                                     | 1.11                                           | 65.3 %          | Over 400°C <sup>[j]</sup>                                   | 360 °C                                         | This work   |

[a] Abbreviations:

BDC = benzene-1,4-dicarboxylate;

H<sub>3</sub>ImDC = 4,5-imidazoledicarboxylic acid;

L<sup>1</sup> = 3,3',5,5'-azobenzene-tetracarboxylate;

1,2-H<sub>2</sub>DACH = 1,2-diaminocyclohexane;

HIPPB = 4,4'-(hexafluoroisopropylidene)bis(benzoate);

THB = thiophene-2,5-dicarboxylate;

L<sup>2</sup> = biphenyl-3,3',5,5'-tetracarboxylate;

4,6-PmDC = 4,6-pyrimidicarboxylate;

choline = [(CH<sub>3</sub>)<sub>3</sub>NCH<sub>2</sub>CH<sub>2</sub>OH]<sup>+</sup>;

BTC = 1,3,5-benzenetricarboxylate;

H<sub>2</sub>PPZ = piperazinium;

L<sup>3</sup> = 1,1',4',1'',4''',1''''-quaterphenyl-3,5,3''',5''''-tetracarboxylate;

2,6-NDC = 2,6-naphthalenedicarboxylate;

TBAPy = 1,3,6,8-tetrakis(*p*-benzoic acid)pyrene;

ADC = azobenzene-4,4'-dicarboxylate;

IN = isonicotinate;

1,2-PDA = 1,2-propanediamine;

H<sub>3</sub>TzDC = 1,2,3-triazole-4,5-dicarboxylic acid;

OBA = 4,4'-oxybis(benzoate);

BBDC = 4,4'-biphenyldicarboxylate;

**L**<sup>4</sup> = [2,7-(9,10-dihydrophenanthrenediyl)]diisophthalate;  
**L**<sup>5</sup> = 1,1',4',1'',4''',1''',4''',1''''-pentaphenyl-3,5,3''',5''''-tetracarboxylate;  
D-CAM = D-(+)-camphoric acid  
**ABTC** = 3,3',5,5'-azobenzenetetracarboxylate;  
**BTB** = 4,4',4''-benzene-1,3,5-triyl-tribenzoate;  
**L**<sup>6</sup> = 5-(3,5-dicarboxybenzyloxy)isophthalate;  
**L**<sup>7</sup> = tetrakis[(3,5-dicarboxyphenoxy)methyl]methane;  
**NH<sub>2</sub>BDC** = 2-amino terephthalate;  
**BPDC** = 4,4'-biphenyldicarboxylate;  
**L**<sup>8</sup> = biphenyl-3,3',5,5'-tetra-(phenyl-4-carboxylate);  
**TDCPB** = 1,3,5-tris(3,5-di(4-carboxy-phenyl-1-yl)phenyl-1-yl)benzene;  
**BPTC** = biphenyl-3,3',5,5'-tetracarboxylate;  
**BTTB** = 4,4',4''-benzene-1,3,5-triyltris(oxy) tribenzoate  
DEF = *N,N*-diethylformamide;  
DMF = *N,N*-dimethylformamide;  
DMA = *N,N*-dimethylacetamide;  
NMF = *N*-methylformamide;  
[b] Data from TGA curves;  
[c] N.A. = Not Available;  
[d] R.T. = Room Temperature  
[e] Data calculated from solvent-exchanged samples;  
[f] Data calculated from activated samples;  
[g] for activated samples at 40 °C;  
[h] for activated samples at 80 °C;  
[i] SCD = Supercritical Carbon Dioxide;  
[j] Data from the heating treatment (at least 3h) under vacuum (< 10<sup>-3</sup> Torr).

## References

- S1 G. Férey, C. Serre, C. Mellot-Draznieks, F. Millange, S. Surblé, J. Dutour and I. Margiolaki, *Angew. Chem. Int. Ed.*, 2004, **43**, 6296–6301.
- S2 G. Férey, C. Mellot-Draznieks, C. Serre, F. Millange, J. Dutour, S. Surblé and I. Margiolaki, *Science*, 2005, **309**, 2040–2042.
- S3 M. Latroche, S. Surblé, C. Serre, C. Mellot-Draznieks, P. L. Llewellyn, J.-H. Lee, J.-S. Chang, S. H. Jhung and G. Férey, *Angew. Chem. Int. Ed.*, 2006, **45**, 8227–8231.
- S4 Y. K. Park, S. B. Choi, H. Kim, K. Kim, B.-H. Won, K. Choi, J.-S. Choi, W.-S. Ahn, N. Won, S. Kim, D. H. Jung, S.-H. Choi, G.-H. Kim, S.-S. Cha, Y. H. Jhon, J. K. Yang and J. Kim, *Angew. Chem. Int. Ed.*, 2007, **46**, 8230–8233.
- S5 F. Nouar, J. F. Eubank, T. Bousquet, L. Wojtas, M. J. Zaworotko and M. Eddaoudi, *J. Am. Chem. Soc.*, 2008, **130**, 1833–1835.
- S6 B. Wang, A. P. Côté, H. Furukawa, M. O’Keeffe and O. M. Yaghi, *Nature*, 2008, **453**, 207–211.
- S7 K. Koh, A. G. Wong-Foy and A. J. Matzger, *J. Am. Chem. Soc.*, 2009, **131**, 4184–4185.
- S8 D. Zhao, D. Yuan, D. Sun and H.-C. Zhou, *J. Am. Chem. Soc.*, 2009, **131**, 9186–9188.
- S9 A. Sonnauer, F. Hoffmann, M. Fröba, L. Kienle, V. Duppel, M. Thommes, C. Serre, G. Férey and N. Stock, *Angew. Chem. Int. Ed.*, 2009, **48**, 3791–3794.
- S10 Y. Yan, X. Lin, S. Yang, A. J. Blake, A. Dailly, N. R. Champness, P. Hubberstey and M. Schröder, *Chem. Commun.*, 2009, 1025–1027.
- S11 N. Klein, I. Senkovska, K. Gedrich, U. Stoeck, A. Henschel, U. Mueller and S. Kaskel, *Angew. Chem. Int. Ed.*, 2009, **48**, 9954–9957.
- S12 H. Furukawa, N. Ko, Y. B. Go, N. Aratani, S. B. Choi, E. Choi, A. Ö. Yazaydin, R. Q. Snurr, M. O’Keeffe, J. Kim and O. M. Yaghi, *Science*, 2010, **329**, 424–428.
- S13 Y. Yan, I. Telepeni, S. Yang, X. Lin, W. Kockelmann, A. Dailly, A. J. Blake, W. Lewis, G. S. Walker, D. R. Allan, S. A. Barnett, N. R. Champness and M. Schröder, *J. Am. Chem. Soc.*, 2010, **132**, 4092–4094.
- S14 D. Yuan, D. Zhao, D. Sun and H.-C. Zhou, *Angew. Chem. Int. Ed.*, 2010, **49**, 5357–5361.
- S15 O. K. Farha, A. Ö. Yazaydin, I. Eryazici, C. D. Malliakas, B. G. Hauser, M. G. Kanatzidis, S. T. Nguyen, R. Q. Snurr and J. T. Hupp, *Nat. Chem.*, 2010, **2**, 944–948.
- S16 Q.-R. Fang, D.-Q. Yuan, J. Sculley, J.-R. Li, Z.-B. Han and H.-C. Zhou, *Inorg. Chem.* 2010, **49**, 11637–11642.
- S17 X. Gu, Z.-H. Lu and Q. Xu, *Chem. Commun.*, 2010, **46**, 7400–7402.
- S18 X. Xi, Y. Fang, T. Dong and Y. Cui, *Angew. Chem. Int. Ed.*, 2011, **50**, 1154–1158.
- S19 D. Yuan, D. Zhao and H.-C. Zhou, *Inorg. Chem.*, 2011, **50**, 10528–10530.
- S20 Y. Yan, S. Yang, A. J. Blake, W. Lewis, E. Poirier, S. A. Barnett, N. R. Champness and M. Schröder, *Chem. Commun.*, 2011, **47**, 9995–9997.
- S21 Y.-Q. Lan, H.-L. Jiang, S.-L. Li and Q. Xu, *Adv. Mater.*, 2011, **23**, 5015–5020.
- S22 D. Yuan, R. B. Getman, Z. Wei, R. Q. Snurr and H.-C. Zhou, *Chem. Commun.*, 2012, **48**, 3297–3299.
- S23 Q.-R. Fang, D.-Q. Yuan, J. Sculley, W.-G. Lu and H.-C. Zhou, *Chem. Commun.*, 2012, **48**,

- 254–256.
- S24 R. Grüner, V. Bon, A. Heerwig, N. Klein, P. Müller, U. Stoeck, I. A. Baburin, U. Mueller, I. Senkovska and S. Kaskel, *Chem. Eur. J.*, 2012, **18**, 13299–13303.
- S25 Q. Yao, J. Sun, K. Li, J. Su, M. V. Peskov and X. Zou, *Dalton Trans.*, 2012, **41**, 3953–3955.
- S26 B. Zheng, Z. Yang, J. Bai, Y. Li and S. Li, *Chem. Commun.*, 2012, **48**, 7025–7027.
- S27 H. Chevreau, T. Devic, F. Salles, G. Maurin, N. Stock and C. Serre, *Angew. Chem. Int. Ed.*, 2013, **52**, 5056–5060.
- S28 C.-Y. Sun, X.-L. Wang, C. Qin, J.-L. Jin, Z.-M. Su, P. Huang and K.-Z. Shao, *Chem. Eur. J.*, 2013, **19**, 3639–3645.
- S29 M. Eddaoudi, J. Kim, N. Rosi, D. Vodak, J. Wachter, M. O’Keeffe and O. M. Yaghi, *Science*, 2002, **295**, 469–472.
- S30 X.-S. Wang, S. Ma, D. Sun, S. Parkin and H.-C. Zhou, *J. Am. Chem. Soc.*, 2006, **128**, 16474–16475.
- S31 L. Ma, A. Jin, Z. Xie and W. Lin, *Angew. Chem. Int. Ed.*, 2009, **48**, 9905–9908.
- S32 L. Ma, J. M. Falkowski, C. Abney and W. Lin, *Nature Chem.*, 2010, **2**, 838–846.
- S33 F. Song, C. Wang, J. M. Falkowski, L. Ma and W. Lin, *J. Am. Chem. Soc.*, 2010, **132**, 15390–15398.
- S34 H.-L. Jiang, Y. Tatsu, Z.-H. Lu and Q. Xu, *J. Am. Chem. Soc.*, 2010, **132**, 5586–5587.
- S35 D. Feng, Z.-Y. Gu, J.-R. Li, H.-L. Jiang, Z. Wei and H.-C. Zhou, *Angew. Chem. Int. Ed.*, 2012, **51**, 10307–10310.
- S36 J. An, O. K. Farha, J. T. Hupp, E. Pohl, J. I. Yeh and N. L. Rosi, *Nature Commun.*, 2012, **3**, 604.
- S37 T. Li, M. T. Kozlowski, E. A. Doud, M. N. Blakely and N. L. Rosi, *J. Am. Chem. Soc.*, 2013, **135**, 11688–11691.
- S38 K. Koh, A. G. Wong-Foy and A. J. Matzger, *Angew. Chem. Int. Ed.*, 2008, **47**, 677–680.
- S39 S.-H. Lo, C.-H. Chien, Y.-L. Lai, C.-C. Yang, J. J. Lee, D. S. Raja and C.-H. Lin, *J. Mater. Chem. A*, 2013, **1**, 324–329.
- S40 Q.-R. Fang, G.-S. Zhu, Z. Jin, Y.-Y. Ji, J.-W. Ye, M. Xue, H. Yang, Y. Wang and S.-L. Qiu, *Angew. Chem. Int. Ed.*, 2007, **46**, 6638–6642.
- S41 H. Deng, S. Grunder, K. E. Cordova, C. Valente, H. Furukawa, M. Hmadeh, F. Gándara, A. C. Whalley, Z. Liu, S. Asahina, H. Kazumori, M. O’Keeffe, O. Terasaki, J. F. Stoddart and O. M. Yaghi, *Science*, 2012, **336**, 1018–1023.
- S42 K. Matsumoto, T. Higashihara and M. Ueda, *Macromolecules*, 2008, **41**, 7560–7565.
- S43 *CrysAlis CCD* and *CrysAlis RED*, version 1.171.35.21, Oxford Diffraction Ltd: Yarnton, Oxfordshire, U.K, 2008.
- S44 (a) G. M. Sheldrick, *SHELXTL, version 6.10*, Bruker Analytical X-ray Systems: Madison, WI, 2001; (b) G. M. Sheldrick, *Acta Cryst.*, 2008, **A64**, 112–122.
- S45 A. L. Spek, *J. Appl. Crystallogr.*, 2003, **36**, 7–13.
- S46 H. K. Chae, D. Y. Siberio-Pérez, J. Kim, Y. Go, M. Eddaoudi, A. J. Matzger, M. O’Keeffe and O. M. Yaghi, *Nature*, 2004, **427**, 523–527.
- S47 J. Kim, B. Chen, T. M. Reineke, H. Li, M. Eddaoudi, D. B. Moler, M. O’Keeffe and O. M. Yaghi, *J. Am. Chem. Soc.*, 2001, **123**, 8239–8247.
- S48 B. Chen, M. Eddaoudi, S. T. Hyde, M. O’Keeffe and O. M. Yaghi, *Science*, 2001, **291**, 1021–1023.



- S49 A. C. Sudik, A. R. Millward, N. W. Ockwig, A. P. Côté, J. Kim and O. M. Yaghi, *J. Am. Chem. Soc.*, 2005, **127**, 7110–7118.
- S50 T. Devic, C. Serre, N. Audebrand, J. Marrot and G. Férey, *J. Am. Chem. Soc.*, 2005, **127**, 12788–12789.
- S51 H. Furukawa, Y. B. Go, N. Ko, Y. K. Park, F. J. Uribe-Romo, J. Kim, M. O’Keeffe and O. M. Yaghi, *Inorg. Chem.*, 2011, **50**, 9147–9152.
- S52 M. Kim, J. A. Boissonnault, C. A. Allen, P. V. Dau and S. M. Cohen, *Dalton Trans.*, 2012, **41**, 6277–6282.
- S53 B. Mu, F. Li, Y. Huang and K. S. Walton, *J. Mater. Chem.*, 2012, **22**, 10172–10178.
- S54 P. V. Dau, K. K. Tanabe and S. M. Cohen, *Chem. Commun.*, 2012, **48**, 9370–9372.
- S55 J. Yu, Y. Cui, C. Wu, Y. Yang, Z. Wang, M. O’Keeffe, B. Chen and G. Qian, *Angew. Chem. Int. Ed.*, 2012, **51**, 10542–10545.
- S56 D. Kim, X. Song, J. H. Yoon and M. S. Lah, *Cryst. Growth Des.*, 2012, **12**, 4186–4193.
- S57 S. Du, C. Hu, J. -C. Xiao, H. Tan and W. Liao, *Chem. Commun.*, 2012, **48**, 9177–9179.
- S58 H. Xiang, W.-Y. Gao, D.-C. Zhong, L. Jiang and T.-B. Lu, *CrystEngComm*, 2011, **13**, 5825–5832.
- S59 P. Maniam and N. Stock, *Inorg. Chem.*, 2011, **50**, 5085–5097.
- S60 D. Han, F.-L. Jiang, M.-Y. Wu, L. Chen, Q.-H. Chen and M.-C. Hong, *Chem. Commun.*, 2011, **47**, 9861–9863.
- S61 S.-T. Zheng, J. J. Bu, T. Wu, C. Chou, P. Feng and X. Bu, *Angew. Chem. Int. Ed.*, 2011, **50**, 8858–8862.
- S62 M. Padmanaban, P. Müller, C. Lieder, K. Gedrich, R. Grütter, V. Bon, I. Senkovska, S. Baumgärtner, S. Opelt, S. Paasch, E. Brunner, F. Glorius, E. Klemm and S. Kaskel, *Chem. Commun.* 2011, **47**, 12089–12091.
- S63 M. L. Foo, S. Horike and S. Kitagawa, *Inorg. Chem.*, 2011, **50**, 11853–11855.
- S64 Y. D. Lampeka, L. V. Tsymbal, A. V. Barna, Y. L. Shul’ga, S. Shova and V. B. Arion, *Dalton Trans.*, 2012, **41**, 4118–4125.
- S65 Q. Lin, T. Wu, X. Bu and P. Feng, *Dalton Trans.*, 2012, **41**, 3620–3622.
- S66 D. F. Sava, L. E. S. Rohwer, M. A. Rodriguez and T. M. Nenoff, *J. Am. Chem. Soc.*, 2012, **134**, 3983–3986.
- S67 N. Klein, I. Senkovska, I. A. Baburin, R. Grütter, U. Stoeck, M. Schlichtenmayer, B. Streppel, U. Mueller, S. Leoni, M. Hirscher and S. Kaskel, *Chem. Eur. J.*, 2011, **17**, 13007–13016.
- S68 Z. Lin, R. Zou, J. Liang, W. Xia, D. Xia, Y. Wang, J. Lin, T. Hu, Q. Chen, X. Wang, Y. Zhao and A. K. Burrell, *J. Mater. Chem.*, 2012, **22**, 7813–7818.
- S69 T. Dröge, A. Notzon, R. Fröhlich and F. Glorius, *Chem. Eur. J.*, 2011, **17**, 11974–11977.
- S70 S.-T. Zheng, T. Wu, C. Chou, A. Fuhr, P. Feng and X. Bu, *J. Am. Chem. Soc.*, 2012, **134**, 4517–4520.
- S71 M. Liu, W. Liao, C. Hu, S. Du and H. Zhang, *Angew. Chem. Int. Ed.*, 2012, **51**, 1585–1588.
- S72 R. Zou, A. I. Abdel-Fattah, H. Xu, A. K. Burrell, T. E. Larson, T. M. McCleskey, Q. Wei, M. T. Janicke, D. D. Hickmott, T. V. Timofeeva and Y. Zhao, *Cryst. Growth Des.*, 2010, **10**, 1301–1306.
- S73 J. Zhang, J. T. Bu, S. Chen, T. Wu, S. Zheng, Y. Chen, R. A. Nieto, P. Feng and X. Bu, *Angew. Chem. Int. Ed.*, 2010, **49**, 8876–8879.

- S74 B. Mu, Y. Huang and K. S. Walton, *CrystEngComm*, 2010, **12**, 2347–2349.
- S75 I. A. Ibarra, X. Lin, S. Yang, A. J. Blake, G. S. Walker, S. A. Barnett, D. R. Allan, N. R. Champness, P. Hubberstey and M. Schröder, *Chem. Eur. J.*, 2010, **16**, 13671–13679.
- S76 K. Gedrich, I. Senkovska, N. Klein, U. Stoeck, A. Henschel, M. R. Lohe, I. A. Baburin, U. Mueller and S. Kaskel, *Angew. Chem. Int. Ed.*, 2010, **49**, 8489–8492.
- S77 D. Dang, P. Wu, C. He, Z. Xie and C. Duan, *J. Am. Chem. Soc.*, 2010, **132**, 14321–14323.
- S78 B. Mu, F. Li and K. S. Walton, *Chem. Commun.*, 2009, 2493–2495.
- S79 L. Hou, J.-P. Zhang and X.-M. Chen, *Cryst. Growth Des.*, 2009, **9**, 2415–2419.
- S80 K. Sumida, M. R. Hill, S. Horike, A. Dailly and J. R. Long, *J. Am. Chem. Soc.*, 2009, **131**, 15120–15121.
- S81 A. Company, N. Roques, M. Güell, V. Mugnaini, L. Gómez, I. Imaz, A. Datcu, M. Solà, J. M. Luis, J. Veciana, X. Ribas and M. Costas, *Dalton Trans.*, 2008, 1679–1682.
- S82 S. R. Caskey and A. J. Matzger, *Inorg. Chem.*, 2008, **47**, 7942–7944.
- S83 L. Hou, J.-P. Zhang, X.-M. Chen and S. W. Ng, *Chem. Commun.*, 2008, 4019–4021.
- S84 R. Heck, J. Bacsá, J. E. Warren, M. J. Rosseinsky and D. Bradshaw, *CrystEngComm*, 2008, **10**, 1687–1692.
- S85 C. Volkringer, T. Loiseau, J. Marrot and G. Férey, *CrystEngComm*, 2009, **11**, 58–60.
- S86 Z. Wang, K. K. Tanabe and S. M. Cohen, *Inorg. Chem.*, 2009, **48**, 296–306.
- S87 S. R. Caskey, A. G. Wong-Foy and A. J. Matzger, *Inorg. Chem.*, 2008, **47**, 7751–7756.
- S88 S. B. Choi, M. J. Seo, M. Cho, Y. Kim, M. K. Jin, D.-Y. Jung, J.-S. Choi, W.-S. Ahn, J. L. C. Rowsell and J. Kim, *Cryst. Growth Des.*, 2007, **7**, 2290–2293.
- S89 D. Sun, S. Ma, Y. Ke, T. M. Petersen and H.-C. Zhou, *Chem. Commun.*, 2005, 2663–2665.
- S90 D. Sun, S. Ma, Y. Ke, D. J. Collins and H.-C. Zhou, *J. Am. Chem. Soc.*, 2006, **128**, 3896–3897.
- S91 S. Ma, D. Yuan, X.-S. Wang and H.-C. Zhou, *Inorg. Chem.*, 2009, **48**, 2072–2077.
- S92 M. P. Suh, H. J. Choi, S. M. So and B. M. Kim, *Inorg. Chem.*, 2003, **42**, 676–678.
- S93 D. Sun, Y. Ke, T. M. Mattox, S. Parkin and H.-C. Zhou, *Inorg. Chem.*, 2006, **45**, 7566–7568.
- S94 K. S. Walton and R. Q. Snurr, *J. Am. Chem. Soc.*, 2007, **129**, 8552–8556.
- S95 J. Sun, L. Weng, Y. Zhou, J. Chen, Z. Chen, Z. Liu and D. Zhao, *Angew. Chem. Int. Ed.*, 2002, **41**, 4471–4473.
- S96 Y. Liu, V. C. Kravtsov, R. Larsen and M. Eddaoudi, *Chem. Commun.*, 2006, 1488–1490.
- S97 Y. Liu, J. F. Eubank, A. J. Cairns, J. Eckert, V. C. Kravtsov, R. Luebke and M. Eddaoudi, *Angew. Chem. Int. Ed.*, 2007, **46**, 3278–3283.
- S98 Y. Liu, V. C. Kravtsov and M. Eddaoudi, *Angew. Chem. Int. Ed.*, 2008, **47**, 8446–8449.
- S99 F. Gándara, B. Gomez-Lor, E. Gutiérrez-Puebla, M. Iglesias, M. A. Monge, D. M. Proserpio and N. Snejko, *Chem. Mater.*, 2008, **20**, 72–76.
- S100 C. Volkringer, M. Meddouri, T. Loiseau, N. Guillou, J. Marrot, G. Férey, M. Haouas, F. Taulelle, N. Audebrand and M. Latroche, *Inorg. Chem.*, 2008, **47**, 11892–11901.
- S101 J. Zhang, S. Chen, T. Wu, P. Feng and X. Bu, *J. Am. Chem. Soc.*, 2008, **130**, 12882–12883.
- S102 S. Yang, X. Lin, A. J. Blake, K. M. Thomas, P. Hubberstey, N. R. Champness and M. Schröder, *Chem. Commun.*, 2008, 6108–6110.
- S103 D. F. Sava, V. C. Kravtsov, F. Nouar, L. Wojtas, J. F. Eubank and M. Eddaoudi, *J. Am. Chem. Soc.*,

- 2008, **130**, 3768–3770.
- S104 D. F. Sava, V. C. Kravtsov, J. Eckert, J. F. Eubank, F. Nouar and M. Eddaoudi, *J. Am. Chem. Soc.*, 2009, **131**, 10394–10396.
- S105 S. Chen, J. Zhang, T. Wu, P. Feng and X. Bu, *J. Am. Chem. Soc.*, 2009, **131**, 16027–16029.
- S106 S. Yang, X. Lin, A. J. Blake, G. S. Walker, P. Hubberstey, N. R. Champness and M. Schröder, *Nat. Chem.*, 2009, **1**, 487–493.
- S107 S. Huh, T.-H. Kwon, N. Park, S.-J. Kim and Y. Kim, *Chem. Commun.*, 2009, 4953–4955.
- S108 K. C. Stylianou, R. Heck, S. Y. Chong, J. Bacsá, J. T. A. Jones, Y. Z. Khimiyak, D. Bradshaw and M. J. Rosseinsky, *J. Am. Chem. Soc.*, 2010, **132**, 4119–4130.
- S109 S. Wang, T. Zhao, G. Li, L. Wojtas, Q. Huo, M. Eddaoudi and Y. Liu, *J. Am. Chem. Soc.*, 2010, **132**, 18038–18041.
- S110 S.-T. Zheng, J. T. Bu, Y. Li, T. Wu, F. Zuo, P. Feng and X. Bu, *J. Am. Chem. Soc.*, 2010, **132**, 17062–17064.
- S111 Z. Jin, H.-Y. Zhao, X.-J. Zhao, Q.-R. Fang, J. R. Long and G.-S. Zhu, *Chem. Commun.*, 2010, **46**, 8612–8614.
- S112 Y.-X. Tan, F. Wang, Y. Kang and J. Zhang, *Chem. Commun.*, 2011, **47**, 770–772.
- S113 S. Yang, G. S. B. Martin, J. J. Titman, A. J. Blake, D. R. Allan, N. R. Champness and M. Schröder, *Inorg. Chem.*, 2011, **50**, 9374–9384.
- S114 L. Wang, T. Song, L. Huang, J. Xu, C. Li, C. Ji, L. Shan and L. Wang, *CrystEngComm*, 2011, **13**, 4005–4009.
- S115 M. Pang, A. J. Cairns, Y. Liu, Y. Belmabkhout, H. C. Zeng and M. Eddaoudi, *J. Am. Chem. Soc.*, 2012, **134**, 13176–13179.
- S116 F. Zhang, X. Zou, W. Feng, X. Zhao, X. Jing, F. Sun, H. Ren and G. Zhu, *J. Mater. Chem.*, 2012, **22**, 25019–25026.
- S117 B. Yuan, D. Ma, X. Wang, Z. Li, Y. Li, H. Liu and D. He, *Chem. Commun.*, 2012, **48**, 1135–1137.
- S118 J.-M. Gu, S.-J. Kim, Y. Kim and S. Huh, *CrystEngComm*, 2012, **14**, 1819–1824.
- S119 Z.-J. Lin, T.-F. Liu, Y.-B. Huang, J. Lü and R. Cao, *Chem. Eur. J.*, 2012, **18**, 7896–7902.
- S120 S.-T. Zheng, T. Wu, F. Zuo, C. Chou, P. Feng and X. Bu, *J. Am. Chem. Soc.*, 2012, **134**, 1934–1937.
- S121 H. Yang, F. Wang, Y. Kang, T.-H. Li and J. Zhang, *Dalton Trans.*, 2012, **41**, 2873–2876.
- S122 S. Yang, X. Lin, W. Lewis, M. Suyetin, E. Bichoutskaia, J. E. Parker, C. C. Tang, D. R. Allan, P. J. Rizkallah, P. Hubberstey, N. R. Champness, K. M. Thomas, A. J. Blake and M. Schröder, *Nature Mater.*, 2012, **11**, 710–716.
- S123 J. Qian, F. Jiang, D. Yuan, M. Wu, S. Zhang, L. Zhang and M. Hong, *Chem. Commun.*, 2012, **48**, 9696–9698.
- S124 J. Jia, F. Sun, T. Borjigin, H. Ren, T. Zhang, Z. Bian, L. Gao and G. Zhu, *Chem. Commun.*, 2012, **48**, 6010–6012.
- S125 Y.-S. Xue, Y. He, L. Zhou, F.-J. Chen, Y. Xu, H.-B. Du, X.-Z. You and B. Chen, *J. Mater. Chem. A*, 2013, **1**, 4525–4530.
- S126 Z.-J. Lin, Y.-B. Huang, T.-F. Liu, X.-Y. Li and R. Cao, *Inorg. Chem.*, 2013, **52**, 3127–3132.
